# Supplementary material for: Comparative Effectiveness of East Asian Traditional Medicine for Childhood Simple Obesity: A Systematic Review and Network Meta-Analysis
Source: MDPI journal article supplement (doi:10.3390/ijerph192012994), 2022-10-11
Supplement: s1 [file s1]

**Supplement S4. Details of herbal medicine used in the included studies**

| Study ID   | Name of herbal medicine                                                                                                                                                                                                                                                 | Dosage form  | Administration duration | Composition and dose of individual herb                                                                                                                                                                                                                                                                                                        | Modifying components                                                                                                                       | Manufacturing company (Chinese patent medicine)      |
|------------|-------------------------------------------------------------------------------------------------------------------------------------------------------------------------------------------------------------------------------------------------------------------------|--------------|-------------------------|------------------------------------------------------------------------------------------------------------------------------------------------------------------------------------------------------------------------------------------------------------------------------------------------------------------------------------------------|--------------------------------------------------------------------------------------------------------------------------------------------|------------------------------------------------------|
| Huang 2021 | modified Wendan-tang                                                                                                                                                                                                                                                    | Decoction    | 12 weeks                | Alismatis Rhizoma, Phyllostachyos Caulis in Taeniam, Pinelliae Tuber, Polygalae Radix, Citri Unshius Pericarpium, Acori Graminei Rhizoma each 10 g, Glycyrrhizae Radix et Rhizoma 6 g, Zingiberis Rhizoma Recens 5 pieces, Zizyphi Fructus 3 g (per day)                                                                                       | -edema: Benincasae Exocarpium 30 g, Polyporus 10 g<br>-anorexia: Atractylodis Rhizoma Alba, Codonopsis Pilosulae Radix each 10 g (per day) | Not applicable                                       |
| Pang 2010  | -spleen deficiency with dampness obstruction: modified Pingwei-san<br>-stomach heat with dampness obstruction: modified Xiehuang-san<br>-dual deficiency of spleen and kidney: modified Liujunzi-tang<br>-yin deficiency with internal heat: modified Qiju-Dihuang-hwan | Not recorded | 60 days                 | Not recorded                                                                                                                                                                                                                                                                                                                                   | None                                                                                                                                       | Not applicable                                       |
| Qin 2016   | modified Cangfu-Daotan-granule                                                                                                                                                                                                                                          | Granule      | 12 weeks                | Atractylodis Rhizoma, Cyperi Rhizoma, Scutellariae Radix, Poria Sclerotium, Curcumae Radix, Trichosanthis Semen, Angelicae Gigantis Radix each 10 g, Pinelliae Tuber, Citri Unshius Pericarpium, Ponciri Fructus Immaturus each 6 g, Amomi Fructus Rotundus, Magnoliae Cortex, Coptidis Rhizoma each 3 g (per 2/3~2 days according to the age) | None                                                                                                                                       | Jiangfen Jiangyin Tianjiang Pharmaceutical Co., Ltd. |
| Shen 2001  | Jiangzhi-tablet                                                                                                                                                                                                                                                         | Tablet       | 3 months                | Rhei Radix et Rhizoma 6~15 g (per day)                                                                                                                                                                                                                                                                                                         | None                                                                                                                                       | Not applicable                                       |
| Song 2017  | Fangfeng-tongsheng-pill                                                                                                                                                                                                                                                 | Pill         | 30 days                 | Saposhnikoviae Radix, Schizonepetae Spica, Menthae Herba, Ephedrae Herba, Rhei Radix et Rhizoma, Natrii Sulfas, Gardeniae Fructus, Talcum, Platycodonis Radix, Gypsum Fibrosum, Cnidii Rhizoma, Angelicae Gigantis Radix, Paeoniae Radix, Scutellariae Radix, Forsythiae Fructus, Glycyrrhizae Radix et Rhizoma, Atractylodis Rhizoma Alba     | None                                                                                                                                       | Beijing Tongrentang Technology Development Co., Ltd. |
| Wang 2019b | Yiqi-Jianpi-tang                                                                                                                                                                                                                                                        | Decoction    | 3 months                | Stigma Maydis 15 g, Astragali Radix, Crataegi Fructus each 12 g, Pseudostellariae Radix 9 g, Citri Unshius Pericarpium, Salviae Miltiorrhizae Radix, Pinelliae Tuber each 6 g (per 1~1.5 days according to the age)                                                                                                                            | None                                                                                                                                       | Not applicable                                       |
| Wang 2021a | Yiqi-Jianpi-tang                                                                                                                                                                                                                                                        | Decoction    | 1 month                 | Stigma Maydis 15 g, Astragali Radix, Crataegi Fructus each 12 g, Pseudostellariae Radix 9 g, Citri Unshius Pericarpium, Salviae Miltiorrhizae Radix, Pinelliae Tuber each 6 g (per 1~1.5 days according to the age)                                                                                                                            | None                                                                                                                                       | Not applicable                                       |

|               |                                                        |                             |          |                                                                                                                                                                                                                                                                                                                                                       |                                                                                                                                                                             |                                                                          |
|---------------|--------------------------------------------------------|-----------------------------|----------|-------------------------------------------------------------------------------------------------------------------------------------------------------------------------------------------------------------------------------------------------------------------------------------------------------------------------------------------------------|-----------------------------------------------------------------------------------------------------------------------------------------------------------------------------|--------------------------------------------------------------------------|
| Xiao<br>2008  | (A) Jianfei oral liquid<br>(B) Fangfeng-tongsheng-pill | (A) Oral liquid<br>(B) Pill | 3 months | (A) Cassiae Semen, Coicis Semen each 15 g, Poria Sclerotium 12 g, Pharbitidis Semen, Nelumbinis Folium, Atractylodis Rhizoma, Atractylodis Rhizoma Alba, Citri Unshius Pericarpium, Salviae Miltiorrhizae Radix, Crataegi Fructus each 10 g, Pinelliae Tuber, Arecae Pericarpium each 8 g (per 1/6~1/3 days according to the age)<br>(B) Not recorded | None                                                                                                                                                                        | Not applicable                                                           |
| Xing<br>2009  | Erchen-tang                                            | Decoction                   | 2 months | Poria Sclerotium 10 g, Mume Fructus 9 g, Pinelliae Tuber, Citri Unshius Pericarpium each 7 g, Zingiberis Rhizoma Recens, Glycyrrhizae Radix et Rhizoma each 6 g (per 2 days)                                                                                                                                                                          | -food accumulation: Crataegi Fructus 9 g<br>-heavy dampness: Polygoni Cuspidati Rhizoma et Radix 7 g<br>-spleen qi deficiency: Codonopsis Pilosulae Radix 10 g (per 2 days) | Not applicable                                                           |
| Xiong<br>2014 | Erchen-tang                                            | Decoction                   | 20 days  | Poria Sclerotium 10 g, Mume Fructus 9 g, Pinelliae Tuber, Citri Unshius Pericarpium each 7 g, Zingiberis Rhizoma Recens, Glycyrrhizae Radix et Rhizoma each 6 g (per day)                                                                                                                                                                             | None                                                                                                                                                                        | Not applicable                                                           |
| Yang<br>2003  | Children's Jianfei-capsule                             | Capsule                     | 3 months | Pinelliae Tuber, Poria Sclerotium, Alismatis Rhizoma, Magnoliae Cortex                                                                                                                                                                                                                                                                                | None                                                                                                                                                                        | Yunnan University of Traditional Chinese Medicine Pharmaceutical Factory |
| Yang<br>2018  | modified Wendan-tang                                   | Decoction                   | 12 weeks | Poria Sclerotium 15 g, Alismatis Rhizoma, Phyllostachyos Caulis in Taeniam, Pinelliae Tuber, Polygalae Radix, Acori Graminei Rhizoma, Citri Unshius Pericarpium each 10 g, Glycyrrhizae Radix et Rhizoma 6 g, Zizyphi Fructus 3 g, Zingiberis Rhizoma Recens 5 pieces (per day)                                                                       | None                                                                                                                                                                        | Not applicable                                                           |
| Yao<br>2019   | modified Erchen-tang                                   | Decoction                   | 3 months | Poria Sclerotium, Pinelliae Tuber, Salviae Miltiorrhizae Radix, Nelumbinis Folium, Ponciri Fructus Immaturus, Arecae Semen, Crataegi Fructus each 9 g, Citri Unshius Pericarpium 6 g, Glycyrrhizae Radix et Rhizoma 3 g (per day)                                                                                                                     | None                                                                                                                                                                        | Not applicable                                                           |
| Zhang<br>2020 | Erchen-tang                                            | Decoction                   | 2 months | Poria Sclerotium 10 g, Mume Fructus 9 g, Pinelliae Tuber, Citri Unshius Pericarpium each 7 g, Zingiberis Rhizoma Recens, Glycyrrhizae Radix et Rhizoma each 6 g (per day)                                                                                                                                                                             | -food accumulation: Crataegi Fructus 9 g<br>-heavy dampness: Polygoni Cuspidati Rhizoma et Radix 7 g<br>-spleen qi deficiency: Codonopsis Pilosulae Radix 10 g (per day)    | Not applicable                                                           |

|              |                        |           |          |                                                                                                                                                                                                                                                                                                                                        |      |                |
|--------------|------------------------|-----------|----------|----------------------------------------------------------------------------------------------------------------------------------------------------------------------------------------------------------------------------------------------------------------------------------------------------------------------------------------|------|----------------|
| Zhou<br>2016 | Fangfeng-tongsheng-san | Decoction | 3 months | Saposhnikoviae Radix, Schizonepetae Spica, Forsythiae Fructus, Menthae<br>Herba, Cnidii Rhizoma, Angelicae Gigantis Radix, Paeoniae Radix,<br>Atractylodis Rhizoma Alba, Gardeniae Fructus, Rhei Radix et Rhizoma,<br>Natrii Sulfas, Gypsum Fibrosum, Scutellariae Radix, Platycodonis Radix,<br>Glycyrrhizae Radix et Rhizoma, Talcum | None | Not applicable |
|--------------|------------------------|-----------|----------|----------------------------------------------------------------------------------------------------------------------------------------------------------------------------------------------------------------------------------------------------------------------------------------------------------------------------------------|------|----------------|
