# Supplementary material for: Comparative Effectiveness of East Asian Traditional Medicine for Childhood Simple Obesity: A Systematic Review and Network Meta-Analysis
Source: MDPI journal article supplement (doi:10.3390/ijerph192012994), 2022-10-11
Supplement: s1 [file s1]

**Supplement S5. Details of non-pharmacological EATMs used in the included studies**

| Study ID   | Stimulation method    | Acupoint                                                                                                                                                                                                                                                                                                                                                                                                                                                                                                                                                                                                                                                                                                    | Needle retention or acupressure time                                                                                             | Frequency       | Treatment duration | Total sessions | Others                                                                       |
|------------|-----------------------|-------------------------------------------------------------------------------------------------------------------------------------------------------------------------------------------------------------------------------------------------------------------------------------------------------------------------------------------------------------------------------------------------------------------------------------------------------------------------------------------------------------------------------------------------------------------------------------------------------------------------------------------------------------------------------------------------------------|----------------------------------------------------------------------------------------------------------------------------------|-----------------|--------------------|----------------|------------------------------------------------------------------------------|
| Cao 2021   | Auricular acupressure | Shenmen, Endocrine, Sympathetic, Lower Tragus, Sanjiao, Subcortex<br>-1-2 adjunct points selected based on the pattern identification<br>*dampness stagnation due to spleen deficiency: Spleen, Stomach, Lung, Heart<br>*stomach heat and dampness stagnation: Stomach, Liver, Large Intestine, Small Intestine<br>*deficiency of spleen and kidney: Spleen, Kidney, Bladder                                                                                                                                                                                                                                                                                                                                | 2-3 min/time<br>(better to produce slight pain)                                                                                  | 4 times a day   | 3 months           | 360            | Use sterile auricular point plasters. Plasters were replaced every other day |
| Cha 2019   | Auricular acupressure | Hunger, Endocrine, Spleen, Shenmen, Stomach                                                                                                                                                                                                                                                                                                                                                                                                                                                                                                                                                                                                                                                                 | 5 min/time<br>(Participants were instructed to slightly press the seed-applied areas before meals and whenever they felt hungry) | once a week     | 8 weeks            | 8              | Use Vaccaria seeds as materials                                              |
| Cha 2020   | Auricular acupressure | Hunger, Endocrine, Spleen, Shenmen, Stomach                                                                                                                                                                                                                                                                                                                                                                                                                                                                                                                                                                                                                                                                 | 5 min/time<br>(Participants were instructed to slightly press the seed-applied areas before meals and whenever they felt hungry) | once a week     | 8 weeks            | 8              | Use ear pellets (seeds) as materials                                         |
| Huang 2004 | Chuna                 | -push down from the child's vertebral column along both sides of the spine (5-7 times)<br>-massage the bilateral BL23, BL20 (50 times), abdomen (100 times)<br>-push from the xiphoid process of the child along the two ribs (50 times)<br>-massage bilateral BL57 to the heel (100 times)<br>*dual effulgence of spleen and stomach: clear the large intestine meridian, relax six bowels, clear the stomach meridian (100 times), massage ST25, LI11, SP6, LI4 (50 times)<br>*liver depression and qi stagnation: clear the liver meridian, massage GB21, LV3, SP6 (50 times)<br>*spleen deficiency and dampness exuberance: transport spleen, transport bagua, massage ST25, ST37, SP4, ST36 (50 times) | Not recorded                                                                                                                     | once a day      | 3 months           | 90             | None                                                                         |
|            | Auricular acupressure | *dual effulgence of spleen and stomach: Hunger, Large Intestine, Small Intestine, Stomach, Heart, Sympathetic<br>*liver depression and qi stagnation: Mouth, Liver, Gallbladder, Shenmen, Subcortex, Endocrine<br>*spleen deficiency and dampness exuberance: Spleen, Hunger, Stomach, Bladder, Kidney, Sanjiao, Lung, Subcortex                                                                                                                                                                                                                                                                                                                                                                            | 5 min                                                                                                                            | 3-5 times a day | 3 months           | 270~450        | Use magnetic beads as materials                                              |

|             |                          |                                                                                                                                                                                                                                                                                                                                                                                                                                                       |                                 |                                    |          |                    |                                                                                                                                                                                                                                                                                            |
|-------------|--------------------------|-------------------------------------------------------------------------------------------------------------------------------------------------------------------------------------------------------------------------------------------------------------------------------------------------------------------------------------------------------------------------------------------------------------------------------------------------------|---------------------------------|------------------------------------|----------|--------------------|--------------------------------------------------------------------------------------------------------------------------------------------------------------------------------------------------------------------------------------------------------------------------------------------|
| Lei<br>2006 | Manual<br>acupuncture    | *spleen deficiency with dampness stagnation: CV12, SP3, BL20, SP6, ST36, CV4, CV6<br>*stomach fire effulgence: ST44, LI11, LI4, ST37, ST25, TW6                                                                                                                                                                                                                                                                                                       | Not recorded                    | Not recorded                       | 30 days  | Not recorded       | *spleen deficiency with dampness stagnation: slight twirling lifting-thrusting supplementation method<br>*stomach fire effulgence: substantial twirling lifting-thrusting draining method                                                                                                  |
| Li<br>2003  | Chuna                    | Jiaji acupoints on both sides of the governor vessel in the back and the acupoints on the stomach meridian of Foot-Yangming, BL21, BL20, BL23, CV13, CV12, CV10                                                                                                                                                                                                                                                                                       | 30 min                          | once a day                         | 30 days  | 30                 | None                                                                                                                                                                                                                                                                                       |
| Li<br>2006  | Electroacupuncture       | (A1) SP6, ST25, ST36, LI11, ST40, ST44, CV12, BL20, BL23, CV6, SP9, ST37, LV3<br>(A2) Hunger, Subcortex, Shenmen, Adrenal gland, Sanjiao, Spleen, Stomach, Lung, Mouth, Large intestine, Lower rectum                                                                                                                                                                                                                                                 | (A1) 10 min<br>(A2) 15-20 min   | (A1) once a day<br>(A2) once a day | 70 days  | (A1) 60<br>(A2) 60 | (A1) 0.32×65mm (Huatuo); deqi;<br>G6805 electroacupuncture therapeutic apparatus, continuous wave, current intensity 3mA, continuous frequency 7Hz<br>(A2) 0.32×25mm (Huatuo); deqi;<br>G6805 electroacupuncture device, continuous wave, the intensity should be tolerated by the patient |
| Li<br>2020  | Chuna                    | CV12, CV8, ST25, CV6, CV4, CV3, BL20, BL21, BL18, BL25, BL23, LI14, LI11, BL36, GB31, BL40, BL57, ST34, ST36, ST40<br>*stomach heat with dampness obstruction: ST44, LI11, ST37<br>*spleen deficiency with dampness obstruction: CV12, ST40, SP9<br>*liver depression and qi stagnation: LV3, LV14, LI4, flank<br>*dual deficiency of spleen and kidney: BL23, GV4, KI3, governor vessel<br>*yin deficiency with internal heat: KI3, ST44, inner calf | Not recorded                    | once a day                         | 6 weeks  | 30                 | None                                                                                                                                                                                                                                                                                       |
|             | Manual<br>acupuncture    | CV12, CV9, CV4, ST25, SP15, LI11, TW6, ST44, ST40, ST37, SP6, SP9<br>*stomach heat with dampness obstruction: LI4<br>*spleen deficiency with dampness obstruction: PC6, ST36<br>*liver depression and qi stagnation: LV14, LV3<br>*dual deficiency of spleen and kidney: CV6, BL20, BL23, ST36<br>*yin deficiency with internal heat: KI3, LU7                                                                                                        | 30 min                          | once a day                         | 6 weeks  | 30                 | 0.20×25mm (Huatuo);<br>deqi                                                                                                                                                                                                                                                                |
| Lin<br>2015 | Fire cupping             | CV12, CV4, bilateral ST25, bilateral ST28, bilateral ST36, bilateral SP9                                                                                                                                                                                                                                                                                                                                                                              | 5 min                           | once a day                         | 4 weeks  | 24                 | None                                                                                                                                                                                                                                                                                       |
|             | Acupressure              | CV12, CV4, bilateral ST25, bilateral ST28, bilateral ST36, bilateral SP9                                                                                                                                                                                                                                                                                                                                                                              | 2 hr                            | once a day                         | 4 weeks  | 24                 | Use Manji magnetic stickers as materials                                                                                                                                                                                                                                                   |
|             | Chuna                    | massage the abdomen, CV12, CV4, bilateral ST25, bilateral ST28, bilateral ST36, bilateral SP9                                                                                                                                                                                                                                                                                                                                                         | 6 min (abdomen), 1 min/acupoint | once a day                         | 4 weeks  | 24                 | None                                                                                                                                                                                                                                                                                       |
| Liu<br>2016 | Chuna                    | rub the spleen meridian, stomach meridian, bladder meridian (5-10 times), massage CV12, ST25, CV4, CV6, ST32, GB30, ST36, BL57, SP6 (1-2 min)                                                                                                                                                                                                                                                                                                         | 30-40 min                       | once a day                         | 12 weeks | 84                 | None                                                                                                                                                                                                                                                                                       |
|             | Auricular<br>acupressure | Spleen, Stomach, Esophagus, Endocrine, Hunger, Sympathetic                                                                                                                                                                                                                                                                                                                                                                                            | 10-20 times/acupoint            | 3-5 times/day                      | 12 weeks | 252-420            | Use Vaccaria seeds as materials                                                                                                                                                                                                                                                            |

|               |                   |                                                                                                                                                                                                                                                                                                                                                                                                                                                                                                                                                                                                                                                                                                                                                                                                                                                                                                                                                                                                                                       |                  |                      |              |              |                                                                                                                                                                                                                   |
|---------------|-------------------|---------------------------------------------------------------------------------------------------------------------------------------------------------------------------------------------------------------------------------------------------------------------------------------------------------------------------------------------------------------------------------------------------------------------------------------------------------------------------------------------------------------------------------------------------------------------------------------------------------------------------------------------------------------------------------------------------------------------------------------------------------------------------------------------------------------------------------------------------------------------------------------------------------------------------------------------------------------------------------------------------------------------------------------|------------------|----------------------|--------------|--------------|-------------------------------------------------------------------------------------------------------------------------------------------------------------------------------------------------------------------|
| Long<br>2019  | Chuna             | <p>*spleen deficiency with dampness obstruction: supplement the spleen meridian (3-10 min), clear the liver meridian (2-5 min), rub banmen, neibagua (1-3 min), massage the abdomen (2-5 min), spine pinching (8-10 times)</p> <p>*stomach heat with dampness obstruction: supplement the spleen meridian (3-10 min), clear the stomach and large intestine meridian (2-5 min), massage bilateral ST40, SP9 (1 min)</p> <p>*liver depression and qi stagnation: supplement the spleen meridian (3-10 min) clear the liver meridian (2-5 min), transport neibagua (1 min), rub flank (1 min), massage bilateral LV3, GB34 (1 min)</p> <p>*dual deficiency of spleen and kidney: supplement the spleen meridian (3-10 min), supplement the kidney meridian (2-5 min), massage BL23, GV4 (1 min), spine pinching (8-10 times)</p> <p>*yin deficiency with internal heat: supplement the spleen meridian (3-10 min), clear the liver meridian (2-5 min), pinch and rub errenshangmaxue (3-10 min), massage bilateral KI3, SP6 (1 min)</p> | Not recorded     | once a day           | 12 weeks     | 60           | None                                                                                                                                                                                                              |
| Song<br>2017  | Chuna             | push the spleen, rub banmen, massage the abdomen, spine pinching, massage ST36                                                                                                                                                                                                                                                                                                                                                                                                                                                                                                                                                                                                                                                                                                                                                                                                                                                                                                                                                        | Not recorded     | once a day           | 5 weeks      | 30           | None                                                                                                                                                                                                              |
| Tai<br>2006   | Chuna             | <p>-supplement the spleen meridian (300 times), clear the stomach meridian (100 times), clear the large intestine meridian (200 times), rub banmen (100 times), clear the small intestine meridian (100 times), transport neibagua (50 times)</p> <p>-massage CV21 (10 times), abdomen (3-5 min), CV12 (2 min), ST25 (100 times), CV9, CV6, ST25, ST24, ST26 (30 min)</p> <p>-spine pinching (3-5 times), massage BL20, BL21, ST36 (30 min), CV15 (100 times), push upward the lumbosacral region (100 times), rub the lumbosacral area (to the degree of mild hyperemia of the local skin)</p>                                                                                                                                                                                                                                                                                                                                                                                                                                       | 40 min           | once every other day | 3 months     | 45           | (A1) Use weight loss massage cream<br>(A2) Use Johnson & Johnson baby oil                                                                                                                                         |
| Tang<br>2016  | Light-moxibustion | CV14, Endocrine, ST25, CV6, ST40, SP6, CV12, ST36, Sympathetic, SP15, CV4, SP9<br>*3-5 acupoints each time                                                                                                                                                                                                                                                                                                                                                                                                                                                                                                                                                                                                                                                                                                                                                                                                                                                                                                                            | 2-3 min/acupoint | once a day           | 3 months     | 90           | Use a light moxibustion weight loss instrument, the wavelength is set to 400~950nm, the illumination is 18Lx, the external temperature is controlled at 40°C. The power of the light moxibustion machine is 170W. |
| Wang<br>2019a | Cupping therapy   | ST25, ST36, CV12, ST40, CV4, SP15, LI11, BL20, ST34, ST28, BL21, push downward the lumbosacral region                                                                                                                                                                                                                                                                                                                                                                                                                                                                                                                                                                                                                                                                                                                                                                                                                                                                                                                                 | 5-10 min         | 5 days a week        | 4 weeks      | 20           | According to the treatment site, three methods of cupping were selected: flash cupping method, slide cupping method and retained cupping method                                                                   |
| Wang<br>2021b | Chuna             | massage the abdomen, lift the skin, massage the thighs, massage and tap the buttocks, shoulders and back, massage ST36 with the thumb                                                                                                                                                                                                                                                                                                                                                                                                                                                                                                                                                                                                                                                                                                                                                                                                                                                                                                 | Not recorded     | Not recorded         | Not recorded | Not recorded | None                                                                                                                                                                                                              |

|               |                          |                                                                                                                                                                                                                                                                                                                                                                                                                                         |                  |                                    |                 |                 |                                                                                                                                                                                                      |
|---------------|--------------------------|-----------------------------------------------------------------------------------------------------------------------------------------------------------------------------------------------------------------------------------------------------------------------------------------------------------------------------------------------------------------------------------------------------------------------------------------|------------------|------------------------------------|-----------------|-----------------|------------------------------------------------------------------------------------------------------------------------------------------------------------------------------------------------------|
| Xing<br>2009  | Electroacupuncture       | CV6, CV12, ST28, ST25, SP15<br>*food accumulation: ST37<br>*heavy dampness: SP9<br>*spleen qi deficiency: ST36                                                                                                                                                                                                                                                                                                                          | 15 min           | once every<br>other day            | 2 months        | 30              | 1.5 inch 32 gauge needles (Huatuo);<br>deqi; D6805-II electroacupuncture<br>therapeutic apparatus (sparse and<br>dense waves)                                                                        |
| Xiong<br>2014 | Electroacupuncture       | CV6, CV12, ST28, ST25, SP15                                                                                                                                                                                                                                                                                                                                                                                                             | 15 min           | once every<br>other day            | 20 days         | 10              | 1.5 inch 32 gauge needles (Huatuo);<br>deqi; D6805-II electroacupuncture<br>therapeutic apparatus                                                                                                    |
| Yao<br>2019   | Auricular<br>acupressure | Hunger, Brain, Endocrine, Spleen, Large intestine                                                                                                                                                                                                                                                                                                                                                                                       | Not recorded     | Compress<br>several times a<br>day | 3 months        | Not<br>recorded | None                                                                                                                                                                                                 |
| Yu<br>1998    | Light-moxibustion        | CV12, CV14, bilateral ST36, ST40, SP9, SP6, Endocrine,<br>Sympathetic, ST25, SP15, CV6, CV4<br>*3-5 acupoints each time                                                                                                                                                                                                                                                                                                                 | 2-3 min/acupoint | once a day                         | 3 months        | 90              | The wavelength is 400 ~ 950nm, the<br>illumination is 18Lx                                                                                                                                           |
|               | Auricular<br>acupressure | Shenmen, Endocrine, Sympathetic, Adrenal gland, Stomach,<br>Spleen<br>*3-4 acupoints each time                                                                                                                                                                                                                                                                                                                                          | 3-5 min/acupoint | 3 times a day                      | 3 months        | 270             | Use Vaccaria seeds as materials                                                                                                                                                                      |
| Zhang<br>2015 | Chuna                    | massage the abdomen, lift the skin, massage the thighs, and<br>massage and tap the buttocks, shoulders and back                                                                                                                                                                                                                                                                                                                         | Not recorded     | Not recorded                       | Not<br>recorded | Not<br>recorded | None                                                                                                                                                                                                 |
| Zhang<br>2020 | Electroacupuncture       | CV6, CV12, ST28, ST25, SP15<br>*food accumulation: ST37, ST39<br>*heavy dampness: SP9<br>*spleen qi deficiency: ST36                                                                                                                                                                                                                                                                                                                    | 15 min           | once every<br>other day            | 2 months        | 30              | 1.5 inch 32 gauge filiform needles<br>(Huatuo); deqi; XS-998B06<br>electroacupuncture therapeutic<br>apparatus (Nanjing Komatsu Medical<br>Instrument Research Institute, sparse<br>and dense waves) |
| Zhu<br>2000   | Auricular<br>acupressure | *gastrointestinal excess heat: Hunger, Large intestine, Small<br>intestine, Stomach, Constipation, Sympathetic, Heart<br>*liver depression and qi stagnation: Mouth, Liver, Gallbladder,<br>Shenmen, Subcortex, Endocrine, Ovary<br>*spleen deficiency with dampness obstruction: Spleen, Stomach,<br>Bladder, Kidney, Sanjiao, Lung, Subcortex                                                                                         | 5 min            | 3-5 times/day                      | 12 weeks        | 252-420         | None                                                                                                                                                                                                 |
|               | Chuna                    | Push the ridge (5-7 times), massage the abdomen (100 times),<br>massage BL57 (100 times)<br>*gastrointestinal excess heat: clear the large intestine meridian,<br>remove six bowels, clear the stomach meridian (100 times)<br>*liver depression and qi stagnation: clear the liver meridian,<br>massage GB21 (50 times)<br>*spleen deficiency with dampness obstruction: transport spleen,<br>transport bagua, massage ST36 (50 times) | Not recorded     | once a day                         | 12 weeks        | 84              | None                                                                                                                                                                                                 |
