# Supplementary material for: Comparative Effectiveness of East Asian Traditional Medicine for Childhood Simple Obesity: A Systematic Review and Network Meta-Analysis
Source: MDPI journal article supplement (doi:10.3390/ijerph192012994), 2022-10-11
Supplement: s1 [file s1]

**Supplement S6. League table for pairwise meta-analysis (right upper part) and network meta-analysis (left lower part) effect estimates: height**

|                          |                             |                              |                     |                          |                          |                   |
|--------------------------|-----------------------------|------------------------------|---------------------|--------------------------|--------------------------|-------------------|
| <b>Acupressure</b>       | -                           | -                            | -                   | -1.70 (-4.14,0.74)       | <b>8.50 (5.50,11.50)</b> | 1.53 (-2.65,5.71) |
| <b>8.16 (0.74,15.58)</b> | <b>Chuna</b>                | -0.70 (-5.99, 4.59)          | -                   | -                        | 1.64 (-4.14,7.42)        | -                 |
| <b>9.63 (2.99,16.27)</b> | 1.47 (-3.95,6.89)           | <b>Chuna + acupressure</b>   | -                   | -                        | -3.61 (-7.27,0.04)       | -                 |
| 4.66 (-4.76,14.08)       | -3.50 (-13.23,6.24)         | -4.96 (-14.12,4.19)          | <b>HM</b>           | -                        | 2.72 (-3.96,9.40)        | -                 |
| -0.80 (-5.60,4.00)       | <b>-8.96 (-15.73,-2.18)</b> | <b>-10.43 (-16.34,-4.51)</b> | -5.46 (-14.37,3.44) | <b>Moxa</b>              | <b>8.16 (3.95,12.37)</b> | -                 |
| <b>7.38 (2.43,12.33)</b> | -0.78 (-6.31,4.76)          | -2.24 (-6.68,2.19)           | 2.72 (-5.30,10.74)  | <b>8.18 (4.30,12.06)</b> | <b>None</b>              | -                 |
| 1.53 (-4.56,7.62)        | -6.63 (-16.23,2.97)         | -8.10 (-17.10,0.91)          | -3.13 (-14.35,8.08) | 2.33 (-5.42,10.08)       | -5.85 (-13.70,1.99)      | <b>Placebo</b>    |

Results are presented as the mean difference (95% confidence interval). The comparison must be read from left to right. A mean difference higher than zero indicates that treatment on the left is favored in both pairwise and network meta-analyses. Bold value means a significant difference between the groups.

HM, herbal medicine; Moxa, moxibustion; None, non-medical management.
