# Supplementary material for: Comparative Effectiveness of East Asian Traditional Medicine for Childhood Simple Obesity: A Systematic Review and Network Meta-Analysis
Source: MDPI journal article supplement (doi:10.3390/ijerph192012994), 2022-10-11
Supplement: s1 [file s1]

**Supplement S3. General clinical characteristics of the included studies**

| Study ID   | Sample size (enrolled →analyzed) | Age (mean ± SD) (yr)                        | Pattern identification                                                                                                                                | (A) Treatment intervention | (B) Control intervention                                                                             | Duration of treatment / F/U | Outcome of interest                                                                                                                   | Adverse events                                                                                                                     |
|------------|----------------------------------|---------------------------------------------|-------------------------------------------------------------------------------------------------------------------------------------------------------|----------------------------|------------------------------------------------------------------------------------------------------|-----------------------------|---------------------------------------------------------------------------------------------------------------------------------------|------------------------------------------------------------------------------------------------------------------------------------|
| Cao 2021   | 190(95:95)                       | (A) $8.1 \pm 0.3$<br>(B) $7.3 \pm 0.3$      | dampness stagnation due to Spleen deficiency, Stomach heat and dampness stagnation, and deficiency of Spleen and Kidney                               | Acupressure                | Non-medical management                                                                               | 3 mon / none                | 1. BMI<br>2. Body weight<br>3. WC<br>4. HC<br>5. TER                                                                                  | NR                                                                                                                                 |
| Cha 2019   | 68(34:34)<br>→58(32:26)          | (A) $16.09 \pm 6.0$<br>(B) $15.96 \pm 5.96$ | NR                                                                                                                                                    | Acupressure                | Placebo<br>(five acupuncture points that have not been effective in obesity treatment were selected) | 8 wk / none                 | 1. BMI<br>2. Body weight<br>3. WC<br>4. WHR<br>5. Body fat ratio<br>6. Body fat mass (kg)                                             | Minor itching on the skin when the tape was attached during auricular acupressure (2 cases, not specified which of the two groups) |
| Cha 2020   | 70(35:35)<br>→65(31:34)          | (A) $10.5 \pm 0.99$<br>(B) $10.4 \pm 0.95$  | NR                                                                                                                                                    | Acupressure                | Placebo<br>(five acupuncture points that have not been effective in obesity treatment were selected) | 8 wk / none                 | 1. BMI<br>2. Body weight<br>3. WC<br>4. HC<br>5. Body fat ratio<br>6. Body fat mass (kg)<br>7. Skeletal muscle mass (kg)<br>8. Height | None                                                                                                                               |
| Huang 2004 | 60(30:30)                        | 3~6                                         | dual effulgence of Spleen and Stomach (30 cases), Liver depression and qi stagnation (20 cases), Spleen deficiency and dampness exuberance (10 cases) | Chuna + Acupressure        | Non-medical management                                                                               | 3 mon / none                | 1. Body weight<br>2. Height<br>3. TER                                                                                                 | NR                                                                                                                                 |
| Huang 2021 | 120(60:60)                       | (A) $7.98 \pm 1.03$<br>(B) $7.95 \pm 1.12$  | NR                                                                                                                                                    | HM                         | Non-medical management                                                                               | 12 wk / none                | 1. TER                                                                                                                                | NR                                                                                                                                 |

|              |                                  |                                                               |                                                                                                                                                                                                                                                                                                                                                                                                                                                                                                                    |                       |                        |              |                                                         |      |
|--------------|----------------------------------|---------------------------------------------------------------|--------------------------------------------------------------------------------------------------------------------------------------------------------------------------------------------------------------------------------------------------------------------------------------------------------------------------------------------------------------------------------------------------------------------------------------------------------------------------------------------------------------------|-----------------------|------------------------|--------------|---------------------------------------------------------|------|
| Lei<br>2006  | 160(130:30)                      | 6~12                                                          | Spleen deficiency with dampness stagnation, Stomach fire effulgence                                                                                                                                                                                                                                                                                                                                                                                                                                                | AT                    | Non-medical management | 30 d / none  | 1. BMI<br>2. TER                                        | NR   |
| Li<br>2003   | 60(30:30)                        | (A) $12 \pm 3$<br>(B) $11 \pm 3$                              | NR                                                                                                                                                                                                                                                                                                                                                                                                                                                                                                                 | Chuna                 | Non-medical management | 30 d / 6 mon | 1. BMI<br>2. Body weight                                | NR   |
| Li<br>2006   | 90(30:30:30<br>→85(26:29:30<br>) | (A1) $16 \pm 1.38$<br>(A2) $15 \pm 2.04$<br>(B) $16 \pm 1.95$ | NR                                                                                                                                                                                                                                                                                                                                                                                                                                                                                                                 | AT                    | Non-medical management | 70 d / 30 d  | 1. BMI<br>2. Body weight<br>3. TER                      | NR   |
| Li<br>2020   | 60(30:30)<br>→<br>56(27:29)      | (A) $9.33 \pm 1.59$<br>(B) $9.24 \pm 1.48$                    | (A) Stomach heat with dampness obstruction (10 cases), Spleen deficiency with dampness obstruction (11 cases), Liver depression and qi stagnation (3 cases), dual deficiency of Spleen and Kidney (1 case), yin deficiency with internal heat (2 cases)<br>(B) Stomach heat with dampness obstruction (11 cases), Spleen deficiency with dampness obstruction (12 cases), Liver depression and qi stagnation (3 cases), dual deficiency of Spleen and Kidney (2 cases), yin deficiency with internal heat (1 case) | Chuna + AT            | Non-medical management | 6 wk / none  | 1. BMI<br>2. Body weight<br>3. WC<br>4. TER             | None |
| Lin<br>2015  | 60(30:30)                        | (A) $13.70 \pm 3.65$<br>(B) $14.81 \pm 3.24$                  | Spleen deficiency with dampness obstruction                                                                                                                                                                                                                                                                                                                                                                                                                                                                        | Cupping + Acupressure | Chuna                  | 4 wk / none  | 1. BMI<br>2. Body weight<br>3. Body fat ratio<br>4. TER | None |
| Liu<br>2016  | 98(52:46)                        | (A) $10.34 \pm 3.46$<br>(B) $10.27 \pm 3.54$                  | NR                                                                                                                                                                                                                                                                                                                                                                                                                                                                                                                 | Chuna + Acupressure   | Non-medical management | 12 wk / none | 1. BMI<br>2. Body weight<br>3. Height<br>4. TER         | NR   |
| Long<br>2019 | 95(47:48)                        | (A) $10.03 \pm 2.15$<br>(B) $9.82 \pm 2.30$                   | Spleen deficiency with dampness obstruction, Stomach heat with dampness obstruction, Liver depression and qi stagnation, dual deficiency of Spleen and Kidney, yin deficiency with internal heat                                                                                                                                                                                                                                                                                                                   | Chuna                 | Non-medical management | 12 wk / none | 1. BMI<br>2. Body weight<br>3. WC<br>4. TER             | None |

|              |                         |                                      |                                                                                                                                                              |             |                        |               |                                                                                                  |                                                                                                                                                                                                                                                       |
|--------------|-------------------------|--------------------------------------|--------------------------------------------------------------------------------------------------------------------------------------------------------------|-------------|------------------------|---------------|--------------------------------------------------------------------------------------------------|-------------------------------------------------------------------------------------------------------------------------------------------------------------------------------------------------------------------------------------------------------|
| Pang<br>2010 | 72(37:35)               | NR                                   | Spleen deficiency with dampness obstruction, Stomach heat with dampness obstruction, dual deficiency of Spleen and Kidney, yin deficiency with internal heat | HM          | Non-medical management | 6 mon / none  | 1. BMI                                                                                           | NR                                                                                                                                                                                                                                                    |
| Qin<br>2016  | 64(32:32)<br>→60(30:30) | (A) 11.03 ± 2.01<br>(B) 10.90 ± 2.14 | phlegm-dampness internal exuberance                                                                                                                          | HM          | Non-medical management | 12 wk / 3 mon | 1. BMI<br>2. TER                                                                                 | None                                                                                                                                                                                                                                                  |
| Shen<br>2001 | 87(45:42)               | (A) 10.2<br>(B) 10.5                 | NR                                                                                                                                                           | HM          | Fenfluramine           | 3 mon / none  | 1. TER                                                                                           | (A) None<br>(B) Four children forced to stop the drug due to obvious side effects, such as drowsiness affecting learning, mental depression, severe anorexia and so on. Another children have dry mouth, dizziness, fatigue, mild diarrhea and so on. |
| Song<br>2017 | 72(36:36)<br>→62(31:31) | 5~13                                 | Spleen-Stomach dampness-heat                                                                                                                                 | Chuna       | HM                     | 5 wk / none   | 1. BMI<br>2. Body weight<br>3. WHR<br>4. TER                                                     | NR                                                                                                                                                                                                                                                    |
| Tai<br>2006  | 68(30:18:20)            | 6~14                                 | Spleen deficiency with dampness obstruction                                                                                                                  | Chuna       | Non-medical management | 3 mon / none  | 1. BMI<br>2. Body weight<br>3. WC<br>4. HC<br>5. WHR<br>6. Body fat ratio<br>7. Height<br>8. TER | A transient increase in appetite (1 case, not specified which of the two groups)                                                                                                                                                                      |
| Tang<br>2016 | 100(50:50)              | (A) 9.2 ± 1.0<br>(B) 9.6 ± 1.1       | NR                                                                                                                                                           | Moxibustion | Non-medical management | 3 mon / none  | 1. Body weight<br>2. Height                                                                      | NR                                                                                                                                                                                                                                                    |

|            |                         |                                            |                                                                 |                  |                        |               |                                                                                     |                                                                                                                                                             |
|------------|-------------------------|--------------------------------------------|-----------------------------------------------------------------|------------------|------------------------|---------------|-------------------------------------------------------------------------------------|-------------------------------------------------------------------------------------------------------------------------------------------------------------|
| Wang 2019a | 64(32:32)<br>→60(30:30) | 7~13                                       | Stomach heat with dampness obstruction                          | Cupping          | Non-medical management | 4 wk / none   | 1. BMI<br>2. Body weight<br>3. WC<br>4. HC<br>5. WHR<br>6. Body fat ratio<br>7. TER | (A) None<br>(B) NR                                                                                                                                          |
| Wang 2019b | 97(49:48)               | (A) $8.73 \pm 6.19$<br>(B) $8.71 \pm 6.12$ | NR                                                              | HM               | Non-medical management | 3 mon / none  | 1. TER                                                                              | NR                                                                                                                                                          |
| Wang 2021a | 74(37:37)               | (A) $7.61 \pm 2.47$<br>(B) $7.54 \pm 2.39$ | NR                                                              | HM               | Non-medical management | 1 mon / none  | 1. TER                                                                              | NR                                                                                                                                                          |
| Wang 2021b | 80(40:40)               | (A) $6.34 \pm 3.67$<br>(B) $6.88 \pm 3.56$ | NR                                                              | Chuna            | Non-medical management | NR / NR       | 1. BMI<br>2. Body fat ratio                                                         | NR                                                                                                                                                          |
| Xiao 2008  | 99(50:49)               | (A) $8 \pm 2.5$<br>(B) $7 \pm 2.6$         | phlegm turbidity obstruction, blood stasis due to qi stagnation | HM               | HM                     | 3 mon / none  | 1. BMI<br>2. TER                                                                    | NR                                                                                                                                                          |
| Xing 2009  | 139(88:51)              | 10~14                                      | food accumulation, heavy dampness, Spleen qi deficiency         | HM + AT          | AT                     | 2 mon / none  | 1. BMI                                                                              | NR                                                                                                                                                          |
| Xiong 2014 | 80(40:40)               | (A) $9.37 \pm 0.59$<br>(B) $9.29 \pm 0.46$ | NR                                                              | HM + AT          | Non-medical management | 20 d / none   | 1. BMI                                                                              | NR                                                                                                                                                          |
| Yang 2003  | 55(35:20)               | (A) 10.23<br>(B) 10                        | Spleen deficiency with dampness obstruction                     | HM               | Non-medical management | 3 mon / none  | 1. Body weight<br>2. Height<br>3. TER                                               | No other adverse reactions were found except that the stool texture became thinner, the odor was obvious, and the stool frequency increased to twice a day. |
| Yang 2018  | 108(54:54)              | (A) 6~14<br>(B) 7~14                       | NR                                                              | HM               | Non-medical management | 12 wk / 6 mon | 1. BMI<br>2. Body weight<br>3. Body fat ratio<br>4. TER                             | N.S<br>(A) mild rash (1 case)<br>(B) none                                                                                                                   |
| Yao 2019   | 60(30:30)               | 7~14                                       | Spleen deficiency with phlegm obstruction                       | HM + Acupressure | Non-medical management | 3 mon / none  | 1. BMI<br>2. TER                                                                    | None                                                                                                                                                        |

|               |                     |                                            |                                                                                                                        |                                      |                        |              |                                       |    |
|---------------|---------------------|--------------------------------------------|------------------------------------------------------------------------------------------------------------------------|--------------------------------------|------------------------|--------------|---------------------------------------|----|
| Yu<br>1998    | 253(101:101:<br>51) | (A1) 10.5<br>(A2) 10.2<br>(B) 10.4         | NR                                                                                                                     | (A1) Moxibustion<br>(A2) Acupressure | Non-medical management | 3 mon / none | 1. Body weight<br>2. Height           | NR |
| Zhang<br>2015 | 60(30:30)           | 5~12                                       | NR                                                                                                                     | Chuna                                | Non-medical management | NR / NR      | 1. BMI<br>2. Body fat ratio<br>3. TER | NR |
| Zhang<br>2020 | 100(50:50)          | (A) $6.53 \pm 1.58$<br>(B) $6.29 \pm 1.62$ | NR                                                                                                                     | HM + AT                              | AT                     | 2 mon / none | 1. BMI<br>2. TER                      | NR |
| Zhou<br>2016  | 60(31:29)           | $12.75 \pm 1.45$                           | excess pattern                                                                                                         | HM                                   | Non-medical management | 3 mon / none | 1. BMI<br>2. WC<br>3. TER             | NR |
| Zhu<br>2000   | 45(25:20)           | 4~6                                        | gastrointestinal excess heat,<br>Liver depression and qi<br>stagnation, Spleen deficiency<br>with dampness obstruction | Chuna + Acupressure                  | Chuna                  | 12 wk / none | 1. Body weight<br>2. Height<br>3. TER | NR |

AT, acupuncture; BMI, body mass index; F/U, follow-up; HC, hip circumference; HM, herbal medicine; NR, not recorded; N.S, not significant between the groups; SD, standard deviation; TER, total effective rate; WC, waist circumference; WHR, waist-hip ratio.
