# Supplementary material for: Comparative Effectiveness of East Asian Traditional Medicine for Childhood Simple Obesity: A Systematic Review and Network Meta-Analysis
Source: MDPI journal article supplement (doi:10.3390/ijerph192012994), 2022-10-11
Supplement: s1 [file s1]

## Supplement S1. Search strategies used in each database and the results

### Medline via PubMed

|    | Searches                                                                                                                                                                                                                                                                                                                                                                                                                                                                                                                                                                                                                                                                                                                                                                                                                                                                                                                                                                                                                                                                                                                                                                                                                                                                                                                                                                                                                                                                                                                                                                         | Results    |
|----|----------------------------------------------------------------------------------------------------------------------------------------------------------------------------------------------------------------------------------------------------------------------------------------------------------------------------------------------------------------------------------------------------------------------------------------------------------------------------------------------------------------------------------------------------------------------------------------------------------------------------------------------------------------------------------------------------------------------------------------------------------------------------------------------------------------------------------------------------------------------------------------------------------------------------------------------------------------------------------------------------------------------------------------------------------------------------------------------------------------------------------------------------------------------------------------------------------------------------------------------------------------------------------------------------------------------------------------------------------------------------------------------------------------------------------------------------------------------------------------------------------------------------------------------------------------------------------|------------|
| #1 | Obesity[MH] OR “Pediatric Obesity”[MH] OR Overweight[MH] OR Obesity[TIAB] OR Overweight[TIAB]                                                                                                                                                                                                                                                                                                                                                                                                                                                                                                                                                                                                                                                                                                                                                                                                                                                                                                                                                                                                                                                                                                                                                                                                                                                                                                                                                                                                                                                                                    | 401788     |
| #2 | Child[MH] OR Pediatrics[MH] OR Infant[MH] OR Adolescent[MH] OR Minors[MH] OR child*[TIAB] OR pediatric*[TIAB] OR infant[TIAB] OR neonate[TIAB] OR newborn[TIAB] OR adolescent[TIAB] OR baby[TIAB]                                                                                                                                                                                                                                                                                                                                                                                                                                                                                                                                                                                                                                                                                                                                                                                                                                                                                                                                                                                                                                                                                                                                                                                                                                                                                                                                                                                | 4417050    |
| #3 | “Herbal Medicine”[MH] OR “Plants, Medicinal”[MH] OR “Drugs, Chinese Herbal”[MH] OR “Medicine, Chinese Traditional”[MH] OR “Medicine, Kampo”[MH] OR “Medicine, Korean Traditional”[MH] OR “traditional Korean medicine”[TIAB] OR “traditional Chinese medicine”[TIAB] OR “traditional oriental medicine”[TIAB] OR “Kampo medicine”[TIAB] OR herb*[TIAB] OR decoction*[TIAB] OR botanic*[TIAB] OR “Chinese patent medicine”[TIAB] OR Acupuncture[MH] OR “Acupuncture Therapy”[MH] OR Auriculotherapy[MH] OR “Acupuncture, Ear”[MH] OR Acupressure[MH] OR Electroacupuncture[MH] OR “Acupuncture Points”[MH] OR acupuncture[TIAB] OR acupressure[TIAB] OR acupoint*[TIAB] OR “trigger point”[TIAB] OR “dry needling”[TIAB] OR “ear acupuncture”[TIAB] OR electroacupuncture[TIAB] OR electro-acupuncture[TIAB] OR pharmacopuncture[TIAB] OR pharmaco-acupuncture[TIAB] OR “Bee Venoms”[MH] OR “bee venom”*[TIAB] OR “acupoint injection”[TIAB] OR Moxibustion[MH] OR moxibustion[TIAB] OR moxa[TIAB] OR “warm needling”[TIAB] OR “Tai Ji”[MH] OR “Tai Chi”[TIAB] OR “T’ai Chi”[TIAB] OR Taiji[TIAB] OR “Tai ji”[TIAB] OR taijiquan[TIAB] OR “Tai Chih”[TIAB] OR “Cupping Therapy”[MH] OR “cupping therapy”[TIAB] OR Qigong[MH] OR “qi gong”[TIAB] OR qigong[TIAB] OR “Breathing Exercises”[MH] OR Massage[MH] OR massage[TIAB] OR tuina[TIAB] OR chuna[TIAB] OR manipulat*[TIAB] OR “manual therapy”[TIAB] OR Chiropractic[TIAB] OR “Musculoskeletal Manipulations”[MH] OR “Manipulation, Spinal”[MH] OR “Manipulation, Chiropractic”[MH] OR “Meditation”[MH] OR “meditation”[TIAB] | 533671     |
| #4 | “Randomized Controlled Trial”[PT] OR “Controlled Clinical Trial”[PT] OR randomized[TIAB] OR placebo[TIAB] OR “Clinical Trials as Topic”[Mesh: noexp] OR randomly[TIAB] OR trial[TI]                                                                                                                                                                                                                                                                                                                                                                                                                                                                                                                                                                                                                                                                                                                                                                                                                                                                                                                                                                                                                                                                                                                                                                                                                                                                                                                                                                                              | 1549346    |
| #5 | animals[MH] NOT humans[MH]                                                                                                                                                                                                                                                                                                                                                                                                                                                                                                                                                                                                                                                                                                                                                                                                                                                                                                                                                                                                                                                                                                                                                                                                                                                                                                                                                                                                                                                                                                                                                       | 5020991    |
| #6 | (#1 AND #2 AND #3 AND #4) NOT #5                                                                                                                                                                                                                                                                                                                                                                                                                                                                                                                                                                                                                                                                                                                                                                                                                                                                                                                                                                                                                                                                                                                                                                                                                                                                                                                                                                                                                                                                                                                                                 | <b>179</b> |

### EMBASE via Elsevier

|    | Searches                                                                                                                                                                                                                                                                                                                                                                                                                                                                                                                                                                                                                                                                                                                                                                                                                                                                                                                                                                                                                                                                                                                                                                                                                                                                                                                                                                                                                                                                                                                                                                                                                                                                                                                                                                                                                                                                                                                                                                                                                                                                                                 | Results |
|----|----------------------------------------------------------------------------------------------------------------------------------------------------------------------------------------------------------------------------------------------------------------------------------------------------------------------------------------------------------------------------------------------------------------------------------------------------------------------------------------------------------------------------------------------------------------------------------------------------------------------------------------------------------------------------------------------------------------------------------------------------------------------------------------------------------------------------------------------------------------------------------------------------------------------------------------------------------------------------------------------------------------------------------------------------------------------------------------------------------------------------------------------------------------------------------------------------------------------------------------------------------------------------------------------------------------------------------------------------------------------------------------------------------------------------------------------------------------------------------------------------------------------------------------------------------------------------------------------------------------------------------------------------------------------------------------------------------------------------------------------------------------------------------------------------------------------------------------------------------------------------------------------------------------------------------------------------------------------------------------------------------------------------------------------------------------------------------------------------------|---------|
| #1 | obesity/exp OR obesity:ab,ti OR overweight:ab,ti                                                                                                                                                                                                                                                                                                                                                                                                                                                                                                                                                                                                                                                                                                                                                                                                                                                                                                                                                                                                                                                                                                                                                                                                                                                                                                                                                                                                                                                                                                                                                                                                                                                                                                                                                                                                                                                                                                                                                                                                                                                         | 732799  |
| #2 | child/exp OR pediatrics/exp OR infant/exp OR adolescent/exp OR 'minor (person)'/exp OR child*:ab,ti OR pediatric*:ab,ti OR infant:ab,ti OR neonate:ab,ti OR newborn:ab,ti OR adolescent:ab,ti OR baby:ab,ti                                                                                                                                                                                                                                                                                                                                                                                                                                                                                                                                                                                                                                                                                                                                                                                                                                                                                                                                                                                                                                                                                                                                                                                                                                                                                                                                                                                                                                                                                                                                                                                                                                                                                                                                                                                                                                                                                              | 4819292 |
| #3 | 'medicinal plant'/exp OR 'medicinal plant':ab,ti OR 'plant medicinal product'/exp OR 'plant medicinal product':ab,ti OR 'herbaceous agent'/exp OR 'herbaceous agent':ab,ti OR 'chinese medicine'/exp OR 'chinese medicine':ab,ti OR 'kampo medicine'/exp OR 'kampo medicine':ab,ti OR 'kampo medicine (drug)'/exp OR 'kampo medicine (drug)':ab,ti OR 'korean medicine'/exp OR 'korean medicine':ab,ti OR 'herbal medicine'/exp OR 'herbal medicine':ab,ti OR 'oriental medicine'/exp OR 'oriental medicine':ab,ti OR herb/exp OR herb:ab,ti OR decoction:ab,ti OR botanic:ab,ti OR 'chinese patent medicine':ab,ti OR acupuncture/exp OR acupuncture:ab,ti OR 'acupuncture therapy':ab,ti OR 'auricular acupuncture'/exp OR 'auricular acupuncture':ab,ti OR 'ear acupuncture':ab,ti OR auriculotherapy:ab,ti OR acupressure/exp OR acupressure:ab,ti OR electroacupuncture/exp OR electroacupuncture:ab,ti OR 'electro-acupuncture':ab,ti OR 'acupuncture point'/exp OR 'acupuncture point':ab,ti OR acupoint:ab,ti OR 'trigger point'/exp OR 'trigger point':ab,ti OR 'dry needling'/exp OR 'dry needling':ab,ti OR pharmacopuncture/exp OR pharmacopuncture:ab,ti OR 'pharmaco-acupuncture':ab,ti OR 'bee venom'/exp OR 'bee venom':ab,ti OR 'acupoint injection':ab,ti OR moxibustion/exp OR moxibustion:ab,ti OR moxa:ab,ti OR 'warm needling':ab,ti OR 'Tai Chi'/exp OR 'Tai Chi':ab,ti OR Taiji:ab,ti OR 'Tai ji':ab,ti OR taijiquan:ab,ti OR 'Tai Chih':ab,ti OR 'cupping therapy'/exp OR 'cupping therapy':ab,ti OR qigong/exp OR qigong:ab,ti OR 'qi gong':ab,ti OR 'breating exercise'/exp OR 'breating exercise':ab,ti OR massage/exp OR massage:ab,ti OR tuina/exp OR tuina:ab,ti OR chuna:ab,ti OR 'manipulative medicine'/exp OR 'manipulative medicine':ab,ti OR 'manual therapy':ab,ti OR chiropractic/exp OR chiropractic:ab,ti OR 'musculoskeletal manipulation'/exp OR 'musculoskeletal manipulation':ab,ti OR 'spine manipulation'/exp OR 'spine manipulation':ab,ti OR 'chiropractic manipulation'/exp OR 'chiropractic manipulation':ab,ti OR meditation/exp OR meditation:ab,ti | 1975302 |
| #4 | 'crossover procedure':de OR 'double-blind procedure':de OR 'randomized controlled trial':de OR 'single-blind procedure':de OR (random* OR factorial* OR crossover* OR cross NEXT/1 over* OR placebo* OR doubl* NEAR/1 blind* OR singl* NEAR/1 blind* OR assign* OR allocat* OR volunteer*):de,ab,ti                                                                                                                                                                                                                                                                                                                                                                                                                                                                                                                                                                                                                                                                                                                                                                                                                                                                                                                                                                                                                                                                                                                                                                                                                                                                                                                                                                                                                                                                                                                                                                                                                                                                                                                                                                                                      | 2956803 |
| #5 | #1 AND #2 AND #3 AND #4                                                                                                                                                                                                                                                                                                                                                                                                                                                                                                                                                                                                                                                                                                                                                                                                                                                                                                                                                                                                                                                                                                                                                                                                                                                                                                                                                                                                                                                                                                                                                                                                                                                                                                                                                                                                                                                                                                                                                                                                                                                                                  | 370     |

## CENTRAL

|    | Searches                                     | Results |
|----|----------------------------------------------|---------|
| #1 | MeSH descriptor: [Obesity] explode all trees | 15872   |

|     |                                                                                                                                                                                                                                                          |        |
|-----|----------------------------------------------------------------------------------------------------------------------------------------------------------------------------------------------------------------------------------------------------------|--------|
| #2  | MeSH descriptor: [Pediatric Obesity] explode all trees                                                                                                                                                                                                   | 1516   |
| #3  | MeSH descriptor: [Overweight] explode all trees                                                                                                                                                                                                          | 18989  |
| #4  | (obesity OR overweight):ti,ab,kw                                                                                                                                                                                                                         | 46913  |
| #5  | #1 OR #2 OR #3 OR #4                                                                                                                                                                                                                                     | 47008  |
| #6  | MeSH descriptor: [Child] explode all trees                                                                                                                                                                                                               | 61534  |
| #7  | MeSH descriptor: [Pediatrics] explode all trees                                                                                                                                                                                                          | 727    |
| #8  | MeSH descriptor: [Infant] explode all trees                                                                                                                                                                                                              | 34961  |
| #9  | MeSH descriptor: [Adolescent] explode all trees                                                                                                                                                                                                          | 110346 |
| #10 | MeSH descriptor: [Minors] explode all trees                                                                                                                                                                                                              | 11     |
| #11 | (child* OR pediatric* OR infant OR neonate OR newborn OR adolescent OR baby):ti,ab,kw                                                                                                                                                                    | 301132 |
| #12 | #6 OR #7 OR #8 OR #9 OR #10 OR #11                                                                                                                                                                                                                       | 301142 |
| #13 | MeSH descriptor: [Herbal Medicine] explode all trees                                                                                                                                                                                                     | 68     |
| #14 | MeSH descriptor: [Plants, Medicinal] explode all trees                                                                                                                                                                                                   | 952    |
| #15 | MeSH descriptor: [Drugs, Chinese Herbal] explode all trees                                                                                                                                                                                               | 3800   |
| #16 | MeSH descriptor: [Medicine, Chinese Traditional] explode all trees                                                                                                                                                                                       | 1274   |
| #17 | MeSH descriptor: [Medicine, Kampo] explode all trees                                                                                                                                                                                                     | 48     |
| #18 | MeSH descriptor: [Medicine, Korean Traditional] explode all trees                                                                                                                                                                                        | 33     |
| #19 | MeSH descriptor: [Acupuncture] explode all trees                                                                                                                                                                                                         | 163    |
| #20 | MeSH descriptor: [Acupuncture Therapy] explode all trees                                                                                                                                                                                                 | 5285   |
| #21 | MeSH descriptor: [Auriculotherapy] explode all trees                                                                                                                                                                                                     | 254    |
| #22 | MeSH descriptor: [Acupuncture, Ear] explode all trees                                                                                                                                                                                                    | 216    |
| #23 | MeSH descriptor: [Acupressure] explode all trees                                                                                                                                                                                                         | 423    |
| #24 | MeSH descriptor: [Electroacupuncture] explode all trees                                                                                                                                                                                                  | 886    |
| #25 | MeSH descriptor: [Acupuncture Points] explode all trees                                                                                                                                                                                                  | 2248   |
| #26 | MeSH descriptor: [Bee Venoms] explode all trees                                                                                                                                                                                                          | 45     |
| #27 | MeSH descriptor: [Moxibustion] explode all trees                                                                                                                                                                                                         | 519    |
| #28 | MeSH descriptor: [Tai Ji] explode all trees                                                                                                                                                                                                              | 405    |
| #29 | MeSH descriptor: [Cupping Therapy] explode all trees                                                                                                                                                                                                     | 15     |
| #30 | MeSH descriptor: [Qigong] explode all trees                                                                                                                                                                                                              | 94     |
| #31 | MeSH descriptor: [Breathing Exercises] explode all trees                                                                                                                                                                                                 | 1001   |
| #32 | MeSH descriptor: [Massage] explode all trees                                                                                                                                                                                                             | 1286   |
| #33 | MeSH descriptor: [Musculoskeletal Manipulations] explode all trees                                                                                                                                                                                       | 3342   |
| #34 | MeSH descriptor: [Manipulation, Spinal] explode all trees                                                                                                                                                                                                | 429    |
| #35 | MeSH descriptor: [Manipulation, Chiropractic] explode all trees                                                                                                                                                                                          | 138    |
| #36 | MeSH descriptor: [Meditation] explode all trees                                                                                                                                                                                                          | 743    |
| #37 | ("traditional Korean medicine" OR "traditional Chinese medicine" OR "traditional oriental medicine" OR "Kampo medicine" OR herb* OR decoction* OR botanic* OR "Chinese patent medicine" OR acupuncture OR acupressure OR acupoint* OR "trigger point" OR | 64187  |

|     |                                                                                                                                                                                                                                                                                                                                                                                                                      |            |
|-----|----------------------------------------------------------------------------------------------------------------------------------------------------------------------------------------------------------------------------------------------------------------------------------------------------------------------------------------------------------------------------------------------------------------------|------------|
|     | "dry needling" OR "ear acupuncture" OR electroacupuncture OR pharmacopuncture OR pharmacoacupuncture OR "bee venom*" OR "acupoint injection" OR moxibustion OR moxa OR "warm needling" OR "Tai Chi" OR "T'ai Chi" OR Taiji OR "Tai ji" OR taijiquan OR "Tai Chih" OR "cupping therapy" OR "qi gong" OR qigong OR massage OR tuina OR chuna OR manipulat* OR "manual therapy" OR Chiropractic OR meditation):ti,ab,kw |            |
| #38 | #13 OR #14 OR #15 OR #16 OR #17 OR #18 OR #19 OR #20 OR #21 OR #22 OR #23 OR #24 OR #25 OR #26 OR #27 OR #28 OR #29 OR #30 OR #31 OR #32 OR #33 OR #34 OR #35 OR #36 OR #37                                                                                                                                                                                                                                          | 66049      |
| #39 | ("Randomized Controlled Trial" OR "Controlled Clinical Trial"):pt                                                                                                                                                                                                                                                                                                                                                    | 640883     |
| #40 | (randomized OR placebo OR randomly OR trial):ti,ab,kw                                                                                                                                                                                                                                                                                                                                                                | 1314752    |
| #41 | MeSH descriptor: [Clinical Trials as Topic] this term only                                                                                                                                                                                                                                                                                                                                                           | 33290      |
| #42 | #39 OR #40 OR #41                                                                                                                                                                                                                                                                                                                                                                                                    | 1458619    |
| #43 | (#5 AND #12 AND #38 AND #42) in Trials                                                                                                                                                                                                                                                                                                                                                                               | <b>212</b> |

#### AMED via EBSCO

|    | Searches                                                                                                                                                                                                                                                                                                                                                                                                                                                                                                                                                                                                                                                                                                                                                                                                                                                                                                                                                                                                                                                                                                                                                                                                       | Results |
|----|----------------------------------------------------------------------------------------------------------------------------------------------------------------------------------------------------------------------------------------------------------------------------------------------------------------------------------------------------------------------------------------------------------------------------------------------------------------------------------------------------------------------------------------------------------------------------------------------------------------------------------------------------------------------------------------------------------------------------------------------------------------------------------------------------------------------------------------------------------------------------------------------------------------------------------------------------------------------------------------------------------------------------------------------------------------------------------------------------------------------------------------------------------------------------------------------------------------|---------|
| #1 | Obesity[SU] OR "Pediatric Obesity"[SU] OR Overweight[SU] OR Obesity[TX] OR Overweight[TX]                                                                                                                                                                                                                                                                                                                                                                                                                                                                                                                                                                                                                                                                                                                                                                                                                                                                                                                                                                                                                                                                                                                      | 3217    |
| #2 | Child[SU] OR Pediatrics[SU] OR Infant[SU] OR Adolescent[SU] OR Minors[SU] OR child*[TX] OR pediatric*[TX] OR infant[TX] OR neonate[TX] OR newborn[TX] OR adolescent[TX] OR baby[TX]                                                                                                                                                                                                                                                                                                                                                                                                                                                                                                                                                                                                                                                                                                                                                                                                                                                                                                                                                                                                                            | 32793   |
| #3 | "Herbal Medicine"[SU] OR "Plants, Medicinal"[SU] OR "Drugs, Chinese Herbal"[SU] OR "Medicine, Chinese Traditional"[SU] OR "Medicine, Kampo"[SU] OR "Medicine, Korean Traditional"[SU] OR "traditional Korean medicine"[TX] OR "traditional Chinese medicine"[TX] OR "traditional oriental medicine"[TX] OR "Kampo medicine"[TX] OR herb*[TX] OR decoction*[TX] OR botanic*[TX] OR "Chinese patent medicine"[TX] OR Acupuncture[SU] OR "Acupuncture Therapy"[SU] OR Auriculotherapy[SU] OR "Acupuncture, Ear"[SU] OR Acupressure[SU] OR Electroacupuncture[SU] OR "Acupuncture Points"[SU] OR acupuncture[TX] OR acupressure[TX] OR acupoint*[TX] OR "trigger point"[TX] OR "dry needling"[TX] OR "ear acupuncture"[TX] OR electroacupuncture[TX] OR electro-acupuncture[TX] OR pharmacopuncture[TX] OR pharmaco-acupuncture[TX] OR "Bee Venoms"[SU] OR "bee venom*" [TX] OR "acupoint injection"[TX] OR Moxibustion[SU] OR moxibustion[TX] OR moxa[TX] OR "warm needling"[TX] OR "Tai Ji" [SU] OR "Tai Chi"[TX] OR "T'ai Chi"[TX] OR Taiji[TX] OR "Tai ji"[TX] OR taijiquan[TX] OR "Tai Chih"[TX] OR "Cupping Therapy"[SU] OR "cupping therapy"[TX] OR Qigong[SU] OR "qi gong"[TX] OR qigong[TX] OR "Breathing | 66343   |

|    |                                                                                                                                                                                                                                                                                   |    |
|----|-----------------------------------------------------------------------------------------------------------------------------------------------------------------------------------------------------------------------------------------------------------------------------------|----|
|    | Exercises"[SU] OR Massage[SU] OR massage[TX] OR tuina[TX] OR chuna[TX] OR manipulat*[TX] OR "manual therapy"[TX] OR Chiropractic[TX] OR "Musculoskeletal Manipulations"[SU] OR "Manipulation, Spinal"[SU] OR "Manipulation, Chiropractic"[SU] OR Meditation[SU] OR meditation[TX] |    |
| #4 | (#1 AND #2 AND #3)                                                                                                                                                                                                                                                                | 26 |

## OASIS

|    | Searches                                                        | Results |
|----|-----------------------------------------------------------------|---------|
| #1 | (비만 과체중) (소아 아동) (한약 약초 본초 침 혈위 지압 봉독 뜸 태극권 부항 기공 마사지 추나 안마 명상) | 4       |

## KISS

|    | Searches                                                                         | Results |
|----|----------------------------------------------------------------------------------|---------|
| #1 | 제목=(비만 과체중) AND 초록=(소아 아동) AND 초록=(한약 약초 본초 침 혈위 지압 봉독 뜸 태극권 부항 기공 마사지 추나 안마 명상) | 13      |

## KMbase

|    | Searches                                                                                                                                                                                                                                                      | Results |
|----|---------------------------------------------------------------------------------------------------------------------------------------------------------------------------------------------------------------------------------------------------------------|---------|
| #1 | ([TITLE=비만] OR [TITLE=과체중])                                                                                                                                                                                                                                   | 3473    |
| #2 | ([ABSTRACT=소아] OR [ABSTRACT=아동])                                                                                                                                                                                                                              | 8924    |
| #3 | ([ABSTRACT=한약] OR [ABSTRACT=약초] OR [ABSTRACT=본초] OR [ABSTRACT=침] OR [ABSTRACT=혈위] OR [ABSTRACT=지압] OR [ABSTRACT=봉독] OR [ABSTRACT=뜸] OR [ABSTRACT=태극권] OR [ABSTRACT=부항] OR [ABSTRACT=기공] OR [ABSTRACT=마사지] OR [ABSTRACT=추나] OR [ABSTRACT=안마] OR [ABSTRACT=명상]) | 11426   |
| #4 | #1 AND #2 AND #3                                                                                                                                                                                                                                              | 2       |

## ScienceON

|    | Searches                                                        | Results |
|----|-----------------------------------------------------------------|---------|
| #1 | (비만 과체중) (소아 아동) (한약 약초 본초 침 혈위 지압 봉독 뜸 태극권 부항 기공 마사지 추나 안마 명상) | 32      |

## CNKI

|    | Searches                                                                                                                      | Results |
|----|-------------------------------------------------------------------------------------------------------------------------------|---------|
| #1 | (SU=肥胖+超重) AND (SU=小儿+儿童+儿+小孩+孩子) AND (SU=中药+中医药+本草+汤+丸+散+颗粒+胶囊+自拟+针+刺法+指压+按压+耳压+穴位+蜂毒+蜂疗+穴位注射+按摩+推拿+牵引+手法+太极拳+气功+灸+火罐+拔罐+冥想) | 172     |

#### Wanfang data

|    | Searches                                                                                                                                                                                                                                                                                                                      | Results |
|----|-------------------------------------------------------------------------------------------------------------------------------------------------------------------------------------------------------------------------------------------------------------------------------------------------------------------------------|---------|
| #1 | (主题:肥胖 OR 主题:超重) AND (主题:小儿 OR 主题:儿童 OR 主题:儿 OR 主题:小孩 OR 主题:孩子) AND (主题:中药 OR 主题:中医药 OR 主题:本草 OR 主题:汤 OR 主题:丸 OR 主题:散 OR 主题:颗粒 OR 主题:胶囊 OR 主题:自拟 OR 主题:针 OR 主题:刺法 OR 主题:指压 OR 主题:按压 OR 主题:耳压 OR 主题:穴位 OR 主题:蜂毒 OR 主题:蜂疗 OR 主题:穴位注射 OR 主题:按摩 OR 主题:推拿 OR 主题:牵引 OR 主题:手法 OR 主题:太极拳 OR 主题:气功 OR 主题:灸 OR 主题:火罐 OR 主题:拔罐 OR 主题:冥想) | 2754    |

#### CQVIP

|    | Searches                                                                                                                                                                                                                     | Results |
|----|------------------------------------------------------------------------------------------------------------------------------------------------------------------------------------------------------------------------------|---------|
| #1 | (M=(肥胖 OR 超重) AND M=(小儿 OR 儿童 OR 儿 OR 小孩 OR 孩子) AND M=(中药 OR 中医药 OR 本草 OR 汤 OR 丸 OR 散 OR 颗粒 OR 胶囊 OR 自拟 OR 针 OR 刺法 OR 指压 OR 按压 OR 耳压 OR 穴位 OR 蜂毒 OR 蜂疗 OR 穴位注射 OR 按摩 OR 推拿 OR 牵引 OR 手法 OR 太极拳 OR 气功 OR 灸 OR 火罐 OR 拔罐 OR 冥想)) | 103     |

#### CiNii

|    | Searches                                                                                                                                                                                                                                                           | Results |
|----|--------------------------------------------------------------------------------------------------------------------------------------------------------------------------------------------------------------------------------------------------------------------|---------|
| #1 | (肥胖 OR 超重) AND (小児 OR 幼子 OR 兒子 OR 子 OR 児 OR 兒童 OR 幼児 OR 乳兒 OR 子供 OR 思春期の OR 青春の) AND (ハーブ OR 漢方薬 OR 中药 OR 本草 OR 鍼 OR 刺法 OR 指圧 OR しあつ OR 按摩 OR 耳圧 OR 穴位 OR はちどく OR 蜂毒 OR 蜂療 OR 穴位注射 OR マッサージ OR カイロプラクティック OR 按摩 OR 推拿 OR 牽引 OR 手法 OR 太極拳 OR 氣功 OR 灸 OR 吸角 OR 拔罐 OR | 34      |

|  |                            |  |
|--|----------------------------|--|
|  | カッピング OR 冥想 OR 瞑想 OR めいそう) |  |
|--|----------------------------|--|
