# Supplementary material for: Comparative Effectiveness of East Asian Traditional Medicine for Childhood Simple Obesity: A Systematic Review and Network Meta-Analysis
Source: MDPI journal article supplement (doi:10.3390/ijerph192012994), 2022-10-11
Supplement: s1 [file s1]

**Supplement S7. League table for pairwise meta-analysis (right upper part) and network meta-analysis (left lower part) effect estimates: total effective rate**

|                  |                  |                  |                  |                     |                  |                       |                  |                  |                  |                  |                    |
|------------------|------------------|------------------|------------------|---------------------|------------------|-----------------------|------------------|------------------|------------------|------------------|--------------------|
| AT               | -                | -                | -                | -                   | -                | -                     | -                | -                | 0.74 (0.58,0.95) | -                | 2.60 (1.75,3.86)   |
| 2.12 (1.39,3.24) | Acupressure      | -                | -                | -                   | -                | -                     | -                | -                | -                | -                | 1.23 (1.07,1.40)   |
| 2.32 (1.52,3.52) | 1.09 (0.90,1.33) | Chuna            | -                | 0.85 (0.64,1.14)    | -                | 1.00 (0.84,1.18)      | -                | 1.13 (0.89,1.42) | -                | -                | 1.19 (0.90,1.58)   |
| 1.40 (0.81,2.39) | 0.66 (0.44,0.97) | 0.60 (0.41,0.89) | Chuna + AT       | -                   | -                | -                     | -                | -                | -                | -                | 1.86 (1.30,2.67)   |
| 2.10 (1.37,3.22) | 0.99 (0.79,1.23) | 0.91 (0.77,1.07) | 1.50 (1.01,2.24) | Chuna + acupressure | -                | -                     | -                | -                | -                | -                | 3.77 (0.08,185.52) |
| 2.12 (1.32,3.39) | 1.00 (0.75,1.34) | 0.91 (0.69,1.22) | 1.52 (0.97,2.37) | 1.01 (0.75,1.37)    | Cupping          | -                     | -                | -                | -                | -                | 1.23 (0.96,1.57)   |
| 2.32 (1.47,3.65) | 1.09 (0.84,1.42) | 1.00 (0.84,1.20) | 1.66 (1.08,2.54) | 1.10 (0.86,1.41)    | 1.09 (0.78,1.53) | Cupping + acupressure | -                | -                | -                | -                | -                  |
| 2.19 (1.42,3.38) | 1.03 (0.82,1.30) | 0.95 (0.78,1.15) | 1.57 (1.05,2.35) | 1.04 (0.83,1.31)    | 1.03 (0.76,1.41) | 0.95 (0.72,1.24)      | Fenfluramine     | 1.02 (0.88,1.17) | -                | -                | -                  |
| 2.23 (1.49,3.34) | 1.05 (0.89,1.24) | 0.96 (0.85,1.09) | 1.60 (1.10,2.32) | 1.06 (0.90,1.25)    | 1.05 (0.81,1.37) | 0.96 (0.77,1.20)      | 1.02 (0.87,1.19) | HM               | -                | -                | 1.23 (1.14,1.32)   |
| 0.74 (0.57,0.95) | 0.35 (0.21,0.57) | 0.32 (0.20,0.52) | 0.53 (0.29,0.96) | 0.35 (0.21,0.58)    | 0.35 (0.20,0.60) | 0.32 (0.19,0.54)      | 0.34 (0.20,0.56) | 0.33 (0.21,0.53) | HM + AT          | -                | -                  |
| 1.14 (0.60,2.17) | 0.54 (0.32,0.91) | 0.49 (0.29,0.83) | 0.82 (0.44,1.52) | 0.55 (0.32,0.92)    | 0.54 (0.31,0.95) | 0.49 (0.29,0.85)      | 0.52 (0.31,0.89) | 0.51 (0.31,0.85) | 1.55 (0.78,3.08) | HM + acupressure | 2.27 (1.38,3.74)   |
| 2.60 (1.75,3.87) | 1.23 (1.06,1.42) | 1.12 (0.98,1.28) | 1.86 (1.29,2.68) | 1.24 (1.05,1.46)    | 1.23 (0.95,1.58) | 1.12 (0.90,1.40)      | 1.19 (1.00,1.41) | 1.17 (1.08,1.26) | 3.52 (2.20,5.65) | 2.27 (1.38,3.75) | None               |

Results are presented as the risk ratio (95% confidence interval). The comparison must be read from left to right. A risk ratio higher than one indicates that treatment on the left is favored in both pairwise and network meta-analyses. Bold value means a significant difference between the groups.

AT, acupuncture; HM, herbal medicine; None, non-medical management.
