# Supplementary material for: Comparative Effectiveness of East Asian Traditional Medicine for Childhood Simple Obesity: A Systematic Review and Network Meta-Analysis
Source: MDPI journal article supplement (doi:10.3390/ijerph192012994), 2022-10-11
Supplement: s1 [file s1]

## Supplement S8. Quality of evidence by the GRADE approach

### (1) BMI

| Comparison  |                          | Direct evidence<br>(pairwise meta-analysis) | Indirect evidence                            | Network meta-analysis                        |
|-------------|--------------------------|---------------------------------------------|----------------------------------------------|----------------------------------------------|
| AT          | Acupressure              | -                                           | Low<br>Risk of bias (-1)<br>Imprecision (-1) | Low<br>Risk of bias (-1)<br>Imprecision (-1) |
| AT          | Chuna                    | -                                           | Moderate<br>Risk of bias (-1)                | Moderate<br>Risk of bias (-1)                |
| AT          | Chuna + AT               | -                                           | Low<br>Risk of bias (-1)<br>Imprecision (-1) | Low<br>Risk of bias (-1)<br>Imprecision (-1) |
| AT          | Chuna +<br>acupressure   | -                                           | Low<br>Risk of bias (-1)<br>Imprecision (-1) | Low<br>Risk of bias (-1)<br>Imprecision (-1) |
| AT          | Cupping                  | -                                           | Low<br>Risk of bias (-1)<br>Imprecision (-1) | Low<br>Risk of bias (-1)<br>Imprecision (-1) |
| AT          | Cupping +<br>acupressure | -                                           | Low<br>Risk of bias (-1)<br>Imprecision (-1) | Low<br>Risk of bias (-1)<br>Imprecision (-1) |
| AT          | HM                       | -                                           | Moderate<br>Risk of bias (-1)                | Moderate<br>Risk of bias (-1)                |
| AT          | HM + AT                  | Moderate<br>Risk of bias (-1)               | Low<br>Risk of bias (-1)<br>Imprecision (-1) | Moderate<br>Risk of bias (-1)                |
| AT          | HM + acupressure         | -                                           | Low<br>Risk of bias (-1)<br>Imprecision (-1) | Low<br>Risk of bias (-1)<br>Imprecision (-1) |
| AT          | None                     | Moderate<br>Risk of bias (-1)               | Low<br>Risk of bias (-1)<br>Imprecision (-1) | Moderate<br>Risk of bias (-1)                |
| AT          | Placebo                  | -                                           | Low<br>Risk of bias (-1)<br>Imprecision (-1) | Low<br>Risk of bias (-1)<br>Imprecision (-1) |
| Acupressure | Chuna                    | -                                           | Low<br>Risk of bias (-1)<br>Imprecision (-1) | Low<br>Risk of bias (-1)<br>Imprecision (-1) |
| Acupressure | Chuna + AT               | -                                           | Low<br>Risk of bias (-1)<br>Imprecision (-1) | Low<br>Risk of bias (-1)<br>Imprecision (-1) |
| Acupressure | Chuna +<br>acupressure   | -                                           | Low<br>Risk of bias (-1)<br>Imprecision (-1) | Low<br>Risk of bias (-1)<br>Imprecision (-1) |
| Acupressure | Cupping                  | -                                           | Low<br>Risk of bias (-1)<br>Imprecision (-1) | Low<br>Risk of bias (-1)<br>Imprecision (-1) |
| Acupressure | Cupping +<br>acupressure | -                                           | Moderate<br>Risk of bias (-1)                | Moderate<br>Risk of bias (-1)                |

|             |                          |                                              |                                              |                                              |
|-------------|--------------------------|----------------------------------------------|----------------------------------------------|----------------------------------------------|
| Acupressure | HM                       | -                                            | Low<br>Risk of bias (-1)<br>Imprecision (-1) | Low<br>Risk of bias (-1)<br>Imprecision (-1) |
| Acupressure | HM + AT                  | -                                            | Low<br>Risk of bias (-1)<br>Imprecision (-1) | Low<br>Risk of bias (-1)<br>Imprecision (-1) |
| Acupressure | HM + acupressure         | -                                            | Low<br>Risk of bias (-1)<br>Imprecision (-1) | Low<br>Risk of bias (-1)<br>Imprecision (-1) |
| Acupressure | None                     | Low<br>Risk of bias (-1)<br>Imprecision (-1) | -                                            | Low<br>Risk of bias (-1)<br>Imprecision (-1) |
| Acupressure | Placebo                  | Low<br>Risk of bias (-1)<br>Imprecision (-1) | -                                            | Low<br>Risk of bias (-1)<br>Imprecision (-1) |
| Chuna       | Chuna + AT               | -                                            | Low<br>Risk of bias (-1)<br>Imprecision (-1) | Low<br>Risk of bias (-1)<br>Imprecision (-1) |
| Chuna       | Chuna +<br>acupressure   | -                                            | Low<br>Risk of bias (-1)<br>Imprecision (-1) | Low<br>Risk of bias (-1)<br>Imprecision (-1) |
| Chuna       | Cupping                  | -                                            | Low<br>Risk of bias (-1)<br>Imprecision (-1) | Low<br>Risk of bias (-1)<br>Imprecision (-1) |
| Chuna       | Cupping +<br>acupressure | Low<br>Risk of bias (-1)<br>Imprecision (-1) | -                                            | Low<br>Risk of bias (-1)<br>Imprecision (-1) |
| Chuna       | HM                       | Low<br>Risk of bias (-1)<br>Imprecision (-1) | Moderate<br>Risk of bias (-1)                | Moderate<br>Risk of bias (-1)                |
| Chuna       | HM + AT                  | -                                            | Low<br>Risk of bias (-1)<br>Imprecision (-1) | Low<br>Risk of bias (-1)<br>Imprecision (-1) |
| Chuna       | HM + acupressure         | -                                            | Low<br>Risk of bias (-1)<br>Imprecision (-1) | Low<br>Risk of bias (-1)<br>Imprecision (-1) |
| Chuna       | None                     | Moderate<br>Risk of bias (-1)                | Low<br>Risk of bias (-1)<br>Imprecision (-1) | Moderate<br>Risk of bias (-1)                |
| Chuna       | Placebo                  | -                                            | Moderate<br>Risk of bias (-1)                | Moderate<br>Risk of bias (-1)                |
| Chuna + AT  | Chuna +<br>acupressure   | -                                            | Low<br>Risk of bias (-1)<br>Imprecision (-1) | Low<br>Risk of bias (-1)<br>Imprecision (-1) |
| Chuna + AT  | Cupping                  | -                                            | Low<br>Risk of bias (-1)<br>Imprecision (-1) | Low<br>Risk of bias (-1)<br>Imprecision (-1) |
| Chuna + AT  | Cupping +<br>acupressure | -                                            | Low<br>Risk of bias (-1)<br>Imprecision (-1) | Low<br>Risk of bias (-1)<br>Imprecision (-1) |
| Chuna + AT  | HM                       | -                                            | Low<br>Risk of bias (-1)<br>Imprecision (-1) | Low<br>Risk of bias (-1)<br>Imprecision (-1) |

|                          |                          |                                              |                                              |                                              |
|--------------------------|--------------------------|----------------------------------------------|----------------------------------------------|----------------------------------------------|
| Chuna + AT               | HM + AT                  | -                                            | Low<br>Risk of bias (-1)<br>Imprecision (-1) | Low<br>Risk of bias (-1)<br>Imprecision (-1) |
| Chuna + AT               | HM + acupressure         | -                                            | Low<br>Risk of bias (-1)<br>Imprecision (-1) | Low<br>Risk of bias (-1)<br>Imprecision (-1) |
| Chuna + AT               | None                     | Low<br>Risk of bias (-1)<br>Imprecision (-1) | -                                            | Low<br>Risk of bias (-1)<br>Imprecision (-1) |
| Chuna + AT               | Placebo                  | -                                            | Low<br>Risk of bias (-1)<br>Imprecision (-1) | Low<br>Risk of bias (-1)<br>Imprecision (-1) |
| Chuna +<br>acupressure   | Cupping                  | -                                            | Low<br>Risk of bias (-1)<br>Imprecision (-1) | Low<br>Risk of bias (-1)<br>Imprecision (-1) |
| Chuna +<br>acupressure   | Cupping +<br>acupressure | -                                            | Low<br>Risk of bias (-1)<br>Imprecision (-1) | Low<br>Risk of bias (-1)<br>Imprecision (-1) |
| Chuna +<br>acupressure   | HM                       | -                                            | Low<br>Risk of bias (-1)<br>Imprecision (-1) | Low<br>Risk of bias (-1)<br>Imprecision (-1) |
| Chuna +<br>acupressure   | HM + AT                  | -                                            | Low<br>Risk of bias (-1)<br>Imprecision (-1) | Low<br>Risk of bias (-1)<br>Imprecision (-1) |
| Chuna +<br>acupressure   | HM + acupressure         | -                                            | Low<br>Risk of bias (-1)<br>Imprecision (-1) | Low<br>Risk of bias (-1)<br>Imprecision (-1) |
| Chuna +<br>acupressure   | None                     | Low<br>Risk of bias (-1)<br>Imprecision (-1) | -                                            | Low<br>Risk of bias (-1)<br>Imprecision (-1) |
| Chuna +<br>acupressure   | Placebo                  | -                                            | Low<br>Risk of bias (-1)<br>Imprecision (-1) | Low<br>Risk of bias (-1)<br>Imprecision (-1) |
| Cupping                  | Cupping +<br>acupressure | -                                            | Moderate<br>Risk of bias (-1)                | Moderate<br>Risk of bias (-1)                |
| Cupping                  | HM                       | -                                            | Low<br>Risk of bias (-1)<br>Imprecision (-1) | Low<br>Risk of bias (-1)<br>Imprecision (-1) |
| Cupping                  | HM + AT                  | -                                            | Low<br>Risk of bias (-1)<br>Imprecision (-1) | Low<br>Risk of bias (-1)<br>Imprecision (-1) |
| Cupping                  | HM + acupressure         | -                                            | Low<br>Risk of bias (-1)<br>Imprecision (-1) | Low<br>Risk of bias (-1)<br>Imprecision (-1) |
| Cupping                  | None                     | Low<br>Risk of bias (-1)<br>Imprecision (-1) | -                                            | Low<br>Risk of bias (-1)<br>Imprecision (-1) |
| Cupping                  | Placebo                  | -                                            | Low<br>Risk of bias (-1)<br>Imprecision (-1) | Low<br>Risk of bias (-1)<br>Imprecision (-1) |
| Cupping +<br>acupressure | HM                       | -                                            | Low<br>Risk of bias (-1)<br>Imprecision (-1) | Low<br>Risk of bias (-1)<br>Imprecision (-1) |

|                          |                  |                                              |                                              |                                              |
|--------------------------|------------------|----------------------------------------------|----------------------------------------------|----------------------------------------------|
| Cupping +<br>acupressure | HM + AT          | -                                            | Low<br>Risk of bias (-1)<br>Imprecision (-1) | Low<br>Risk of bias (-1)<br>Imprecision (-1) |
| Cupping +<br>acupressure | HM + acupressure | -                                            | Low<br>Risk of bias (-1)<br>Imprecision (-1) | Low<br>Risk of bias (-1)<br>Imprecision (-1) |
| Cupping +<br>acupressure | None             | -                                            | Low<br>Risk of bias (-1)<br>Imprecision (-1) | Low<br>Risk of bias (-1)<br>Imprecision (-1) |
| Cupping +<br>acupressure | Placebo          | -                                            | Moderate<br>Risk of bias (-1)                | Moderate<br>Risk of bias (-1)                |
| HM                       | HM + AT          | -                                            | Low<br>Risk of bias (-1)<br>Imprecision (-1) | Low<br>Risk of bias (-1)<br>Imprecision (-1) |
| HM                       | HM + acupressure | -                                            | Low<br>Risk of bias (-1)<br>Imprecision (-1) | Low<br>Risk of bias (-1)<br>Imprecision (-1) |
| HM                       | None             | Moderate<br>Risk of bias (-1)                | Low<br>Risk of bias (-1)<br>Imprecision (-1) | Moderate<br>Risk of bias (-1)                |
| HM                       | Placebo          | -                                            | Moderate<br>Risk of bias (-1)                | Moderate<br>Risk of bias (-1)                |
| HM + AT                  | HM + acupressure | -                                            | Low<br>Risk of bias (-1)<br>Imprecision (-1) | Moderate<br>Risk of bias (-1)                |
| HM + AT                  | None             | Low<br>Risk of bias (-1)<br>Imprecision (-1) | Moderate<br>Risk of bias (-1)                | Moderate<br>Risk of bias (-1)                |
| HM + AT                  | Placebo          | -                                            | Low<br>Risk of bias (-1)<br>Imprecision (-1) | Low<br>Risk of bias (-1)<br>Imprecision (-1) |
| HM + acupressure         | None             | Low<br>Risk of bias (-1)<br>Imprecision (-1) | -                                            | Low<br>Risk of bias (-1)<br>Imprecision (-1) |
| HM + acupressure         | Placebo          | -                                            | Low<br>Risk of bias (-1)<br>Imprecision (-1) | Low<br>Risk of bias (-1)<br>Imprecision (-1) |
| None                     | Placebo          | -                                            | Low<br>Risk of bias (-1)<br>Imprecision (-1) | Low<br>Risk of bias (-1)<br>Imprecision (-1) |

(2) Body weight

| Comparison |             | Direct evidence<br>(pairwise meta-<br>analysis) | Indirect evidence                            | Network meta-<br>analysis                    |
|------------|-------------|-------------------------------------------------|----------------------------------------------|----------------------------------------------|
| AT         | Acupressure | -                                               | Low<br>Risk of bias (-1)<br>Imprecision (-1) | Low<br>Risk of bias (-1)<br>Imprecision (-1) |
| AT         | Chuna       | -                                               | Low<br>Risk of bias (-1)<br>Imprecision (-1) | Low<br>Risk of bias (-1)<br>Imprecision (-1) |
| AT         | Chuna + AT  | -                                               | Low<br>Risk of bias (-1)<br>Imprecision (-1) | Low<br>Risk of bias (-1)<br>Imprecision (-1) |

|             |                          |                                              |                                                                         |                                                                         |
|-------------|--------------------------|----------------------------------------------|-------------------------------------------------------------------------|-------------------------------------------------------------------------|
| AT          | Chuna +<br>acupressure   | -                                            | Low<br>Risk of bias (-1)<br>Imprecision (-1)                            | Low<br>Risk of bias (-1)<br>Imprecision (-1)                            |
| AT          | Cupping                  | -                                            | Low<br>Risk of bias (-1)<br>Imprecision (-1)                            | Low<br>Risk of bias (-1)<br>Imprecision (-1)                            |
| AT          | Cupping +<br>acupressure | -                                            | Low<br>Risk of bias (-1)<br>Imprecision (-1)                            | Low<br>Risk of bias (-1)<br>Imprecision (-1)                            |
| AT          | HM                       | -                                            | Low<br>Risk of bias (-1)<br>Imprecision (-1)                            | Low<br>Risk of bias (-1)<br>Imprecision (-1)                            |
| AT          | Moxa                     | -                                            | Very low<br>Risk of bias (-1)<br>Inconsistency (-2)<br>Imprecision (-1) | Very low<br>Risk of bias (-1)<br>Inconsistency (-2)<br>Imprecision (-1) |
| AT          | None                     | Low<br>Risk of bias (-1)<br>Imprecision (-1) | -                                                                       | Low<br>Risk of bias (-1)<br>Imprecision (-1)                            |
| AT          | Placebo                  | -                                            | Low<br>Risk of bias (-1)<br>Imprecision (-1)                            | Low<br>Risk of bias (-1)<br>Imprecision (-1)                            |
| Acupressure | Chuna                    | -                                            | Low<br>Risk of bias (-1)<br>Imprecision (-1)                            | Low<br>Risk of bias (-1)<br>Imprecision (-1)                            |
| Acupressure | Chuna + AT               | -                                            | Low<br>Risk of bias (-1)<br>Imprecision (-1)                            | Low<br>Risk of bias (-1)<br>Imprecision (-1)                            |
| Acupressure | Chuna +<br>acupressure   | -                                            | Low<br>Risk of bias (-1)<br>Imprecision (-1)                            | Low<br>Risk of bias (-1)<br>Imprecision (-1)                            |
| Acupressure | Cupping                  | -                                            | Low<br>Risk of bias (-1)<br>Imprecision (-1)                            | Low<br>Risk of bias (-1)<br>Imprecision (-1)                            |
| Acupressure | Cupping +<br>acupressure | -                                            | Moderate<br>Risk of bias (-1)                                           | Moderate<br>Risk of bias (-1)                                           |
| Acupressure | HM                       | -                                            | Low<br>Risk of bias (-1)<br>Imprecision (-1)                            | Low<br>Risk of bias (-1)<br>Imprecision (-1)                            |
| Acupressure | Moxa                     | Low<br>Risk of bias (-1)<br>Imprecision (-1) | Very low<br>Risk of bias (-1)<br>Inconsistency (-2)<br>Imprecision (-1) | Low<br>Risk of bias (-1)<br>Imprecision (-1)                            |
| Acupressure | None                     | Low<br>Risk of bias (-1)<br>Imprecision (-1) | Very low<br>Risk of bias (-1)<br>Inconsistency (-2)<br>Imprecision (-1) | Low<br>Risk of bias (-1)<br>Imprecision (-1)                            |
| Acupressure | Placebo                  | Low<br>Risk of bias (-1)<br>Imprecision (-1) | -                                                                       | Low<br>Risk of bias (-1)<br>Imprecision (-1)                            |
| Chuna       | Chuna + AT               | -                                            | Low<br>Risk of bias (-1)<br>Imprecision (-1)                            | Low<br>Risk of bias (-1)<br>Imprecision (-1)                            |
| Chuna       | Chuna +<br>acupressure   | Low<br>Risk of bias (-1)<br>Imprecision (-1) | Moderate<br>Risk of bias (-1)                                           | Moderate<br>Risk of bias (-1)                                           |

|                        |                          |                                              |                                                                         |                                                                         |
|------------------------|--------------------------|----------------------------------------------|-------------------------------------------------------------------------|-------------------------------------------------------------------------|
| Chuna                  | Cupping                  | -                                            | Low<br>Risk of bias (-1)<br>Imprecision (-1)                            | Low<br>Risk of bias (-1)<br>Imprecision (-1)                            |
| Chuna                  | Cupping +<br>acupressure | Low<br>Risk of bias (-1)<br>Imprecision (-1) | -                                                                       | Low<br>Risk of bias (-1)<br>Imprecision (-1)                            |
| Chuna                  | HM                       | Low<br>Risk of bias (-1)<br>Imprecision (-1) | Moderate<br>Risk of bias (-1)                                           | Moderate<br>Risk of bias (-1)                                           |
| Chuna                  | Moxa                     | -                                            | Very low<br>Risk of bias (-1)<br>Inconsistency (-2)<br>Imprecision (-1) | Very low<br>Risk of bias (-1)<br>Inconsistency (-2)<br>Imprecision (-1) |
| Chuna                  | None                     | Moderate<br>Risk of bias (-1)                | Low<br>Risk of bias (-1)<br>Imprecision (-1)                            | Moderate<br>Risk of bias (-1)                                           |
| Chuna                  | Placebo                  | -                                            | Moderate<br>Risk of bias (-1)                                           | Moderate<br>Risk of bias (-1)                                           |
| Chuna + AT             | Chuna +<br>acupressure   | -                                            | Low<br>Risk of bias (-1)<br>Imprecision (-1)                            | Low<br>Risk of bias (-1)<br>Imprecision (-1)                            |
| Chuna + AT             | Cupping                  | -                                            | Low<br>Risk of bias (-1)<br>Imprecision (-1)                            | Low<br>Risk of bias (-1)<br>Imprecision (-1)                            |
| Chuna + AT             | Cupping +<br>acupressure | -                                            | Low<br>Risk of bias (-1)<br>Imprecision (-1)                            | Low<br>Risk of bias (-1)<br>Imprecision (-1)                            |
| Chuna + AT             | HM                       | -                                            | Low<br>Risk of bias (-1)<br>Imprecision (-1)                            | Low<br>Risk of bias (-1)<br>Imprecision (-1)                            |
| Chuna + AT             | Moxa                     | -                                            | Very low<br>Risk of bias (-1)<br>Inconsistency (-2)<br>Imprecision (-1) | Very low<br>Risk of bias (-1)<br>Inconsistency (-2)<br>Imprecision (-1) |
| Chuna + AT             | None                     | Low<br>Risk of bias (-1)<br>Imprecision (-1) | -                                                                       | Low<br>Risk of bias (-1)<br>Imprecision (-1)                            |
| Chuna + AT             | Placebo                  | -                                            | Low<br>Risk of bias (-1)<br>Imprecision (-1)                            | Low<br>Risk of bias (-1)<br>Imprecision (-1)                            |
| Chuna +<br>acupressure | Cupping                  | -                                            | Low<br>Risk of bias (-1)<br>Imprecision (-1)                            | Low<br>Risk of bias (-1)<br>Imprecision (-1)                            |
| Chuna +<br>acupressure | Cupping +<br>acupressure | -                                            | Low<br>Risk of bias (-1)<br>Imprecision (-1)                            | Low<br>Risk of bias (-1)<br>Imprecision (-1)                            |
| Chuna +<br>acupressure | HM                       | -                                            | Moderate<br>Risk of bias (-1)                                           | Moderate<br>Risk of bias (-1)                                           |
| Chuna +<br>acupressure | Moxa                     | -                                            | Very low<br>Risk of bias (-1)<br>Inconsistency (-2)<br>Imprecision (-1) | Very low<br>Risk of bias (-1)<br>Inconsistency (-2)<br>Imprecision (-1) |
| Chuna +<br>acupressure | None                     | Moderate<br>Risk of bias (-1)                | Low<br>Risk of bias (-1)<br>Imprecision (-1)                            | Moderate<br>Risk of bias (-1)                                           |

|                          |                          |                                                                         |                                                                         |                                                                         |
|--------------------------|--------------------------|-------------------------------------------------------------------------|-------------------------------------------------------------------------|-------------------------------------------------------------------------|
| Chuna +<br>acupressure   | Placebo                  | -                                                                       | Low<br>Risk of bias (-1)<br>Imprecision (-1)                            | Low<br>Risk of bias (-1)<br>Imprecision (-1)                            |
| Cupping                  | Cupping +<br>acupressure | -                                                                       | Low<br>Risk of bias (-1)<br>Imprecision (-1)                            | Low<br>Risk of bias (-1)<br>Imprecision (-1)                            |
| Cupping                  | HM                       | -                                                                       | Low<br>Risk of bias (-1)<br>Imprecision (-1)                            | Low<br>Risk of bias (-1)<br>Imprecision (-1)                            |
| Cupping                  | Moxa                     | -                                                                       | Very low<br>Risk of bias (-1)<br>Inconsistency (-2)<br>Imprecision (-1) | Very low<br>Risk of bias (-1)<br>Inconsistency (-2)<br>Imprecision (-1) |
| Cupping                  | None                     | Low<br>Risk of bias (-1)<br>Imprecision (-1)                            | -                                                                       | Low<br>Risk of bias (-1)<br>Imprecision (-1)                            |
| Cupping                  | Placebo                  | -                                                                       | Low<br>Risk of bias (-1)<br>Imprecision (-1)                            | Low<br>Risk of bias (-1)<br>Imprecision (-1)                            |
| Cupping +<br>acupressure | HM                       | -                                                                       | Low<br>Risk of bias (-1)<br>Imprecision (-1)                            | Low<br>Risk of bias (-1)<br>Imprecision (-1)                            |
| Cupping +<br>acupressure | Moxa                     | -                                                                       | Moderate<br>Risk of bias (-1)                                           | Moderate<br>Risk of bias (-1)                                           |
| Cupping +<br>acupressure | None                     | -                                                                       | Low<br>Risk of bias (-1)<br>Imprecision (-1)                            | Low<br>Risk of bias (-1)<br>Imprecision (-1)                            |
| Cupping +<br>acupressure | Placebo                  | -                                                                       | Moderate<br>Risk of bias (-1)                                           | Moderate<br>Risk of bias (-1)                                           |
| HM                       | Moxa                     | -                                                                       | Very low<br>Risk of bias (-1)<br>Inconsistency (-2)<br>Imprecision (-1) | Very low<br>Risk of bias (-1)<br>Inconsistency (-2)<br>Imprecision (-1) |
| HM                       | None                     | Moderate<br>Risk of bias (-1)                                           | Low<br>Risk of bias (-1)<br>Imprecision (-1)                            | Moderate<br>Risk of bias (-1)                                           |
| HM                       | Placebo                  | -                                                                       | Moderate<br>Risk of bias (-1)                                           | Moderate<br>Risk of bias (-1)                                           |
| Moxa                     | None                     | Very low<br>Risk of bias (-1)<br>Inconsistency (-2)<br>Imprecision (-1) | Low<br>Risk of bias (-1)<br>Imprecision (-1)                            | Low<br>Risk of bias (-1)<br>Imprecision (-1)                            |
| Moxa                     | Placebo                  | -                                                                       | Low<br>Risk of bias (-1)<br>Imprecision (-1)                            | Low<br>Risk of bias (-1)<br>Imprecision (-1)                            |
| None                     | Placebo                  | -                                                                       | Low<br>Risk of bias (-1)<br>Imprecision (-1)                            | Low<br>Risk of bias (-1)<br>Imprecision (-1)                            |

## (3) Height

| Comparison             |                        | Direct evidence<br>(pairwise meta-analysis)  | Indirect evidence                            | Network meta-analysis                        |
|------------------------|------------------------|----------------------------------------------|----------------------------------------------|----------------------------------------------|
| Acupressure            | Chuna                  | -                                            | Low<br>Risk of bias (-1)<br>Imprecision (-1) | Low<br>Risk of bias (-1)<br>Imprecision (-1) |
| Acupressure            | Chuna +<br>acupressure | -                                            | Low<br>Risk of bias (-1)<br>Imprecision (-1) | Low<br>Risk of bias (-1)<br>Imprecision (-1) |
| Acupressure            | HM                     | -                                            | Low<br>Risk of bias (-1)<br>Imprecision (-1) | Low<br>Risk of bias (-1)<br>Imprecision (-1) |
| Acupressure            | Moxa                   | Low<br>Risk of bias (-1)<br>Imprecision (-1) | Moderate<br>Risk of bias (-1)                | Moderate<br>Risk of bias (-1)                |
| Acupressure            | None                   | Moderate<br>Risk of bias (-1)                | Low<br>Risk of bias (-1)<br>Imprecision (-1) | Moderate<br>Risk of bias (-1)                |
| Acupressure            | Placebo                | Low<br>Risk of bias (-1)<br>Imprecision (-1) | -                                            | -                                            |
| Chuna                  | Chuna +<br>acupressure | Low<br>Risk of bias (-1)<br>Imprecision (-1) | Low<br>Risk of bias (-1)<br>Imprecision (-1) | Low<br>Risk of bias (-1)<br>Imprecision (-1) |
| Chuna                  | HM                     | -                                            | Low<br>Risk of bias (-1)<br>Imprecision (-1) | Low<br>Risk of bias (-1)<br>Imprecision (-1) |
| Chuna                  | Moxa                   | -                                            | Low<br>Risk of bias (-1)<br>Imprecision (-1) | Low<br>Risk of bias (-1)<br>Imprecision (-1) |
| Chuna                  | None                   | Low<br>Risk of bias (-1)<br>Imprecision (-1) | Low<br>Risk of bias (-1)<br>Imprecision (-1) | Low<br>Risk of bias (-1)<br>Imprecision (-1) |
| Chuna                  | Placebo                | -                                            | Low<br>Risk of bias (-1)<br>Imprecision (-1) | Low<br>Risk of bias (-1)<br>Imprecision (-1) |
| Chuna +<br>acupressure | HM                     | -                                            | Low<br>Risk of bias (-1)<br>Imprecision (-1) | Low<br>Risk of bias (-1)<br>Imprecision (-1) |
| Chuna +<br>acupressure | Moxa                   | -                                            | Low<br>Risk of bias (-1)<br>Imprecision (-1) | Low<br>Risk of bias (-1)<br>Imprecision (-1) |
| Chuna +<br>acupressure | None                   | Low<br>Risk of bias (-1)<br>Imprecision (-1) | Low<br>Risk of bias (-1)<br>Imprecision (-1) | Low<br>Risk of bias (-1)<br>Imprecision (-1) |
| Chuna +<br>acupressure | Placebo                | -                                            | Low<br>Risk of bias (-1)<br>Imprecision (-1) | Low<br>Risk of bias (-1)<br>Imprecision (-1) |
| HM                     | Moxa                   | -                                            | Low<br>Risk of bias (-1)<br>Imprecision (-1) | Low<br>Risk of bias (-1)<br>Imprecision (-1) |
| HM                     | None                   | Low<br>Risk of bias (-1)<br>Imprecision (-1) | -                                            | Low<br>Risk of bias (-1)<br>Imprecision (-1) |

|      |         |                               |                                              |                                              |
|------|---------|-------------------------------|----------------------------------------------|----------------------------------------------|
| HM   | Placebo | -                             | Low<br>Risk of bias (-1)<br>Imprecision (-1) | Low<br>Risk of bias (-1)<br>Imprecision (-1) |
| Moxa | None    | Moderate<br>Risk of bias (-1) | Low<br>Risk of bias (-1)<br>Imprecision (-1) | Moderate<br>Risk of bias (-1)                |
| Moxa | Placebo | -                             | Low<br>Risk of bias (-1)<br>Imprecision (-1) | Low<br>Risk of bias (-1)<br>Imprecision (-1) |
| None | Placebo | -                             | Low<br>Risk of bias (-1)<br>Imprecision (-1) | Low<br>Risk of bias (-1)<br>Imprecision (-1) |

(4) Total effective rate

| Comparison  |                          | Direct evidence<br>(pairwise meta-analysis)  | Indirect evidence                            | Network meta-analysis                        |
|-------------|--------------------------|----------------------------------------------|----------------------------------------------|----------------------------------------------|
| AT          | Acupressure              | -                                            | Moderate<br>Risk of bias (-1)                | Moderate<br>Risk of bias (-1)                |
| AT          | Chuna                    | -                                            | Low<br>Risk of bias (-1)<br>Imprecision (-1) | Low<br>Risk of bias (-1)<br>Imprecision (-1) |
| AT          | Chuna + AT               | -                                            | Low<br>Risk of bias (-1)<br>Imprecision (-1) | Low<br>Risk of bias (-1)<br>Imprecision (-1) |
| AT          | Chuna +<br>acupressure   | -                                            | Low<br>Risk of bias (-1)<br>Imprecision (-1) | Low<br>Risk of bias (-1)<br>Imprecision (-1) |
| AT          | Cupping                  | -                                            | Low<br>Risk of bias (-1)<br>Imprecision (-1) | Low<br>Risk of bias (-1)<br>Imprecision (-1) |
| AT          | Cupping +<br>acupressure | -                                            | Moderate<br>Risk of bias (-1)                | Moderate<br>Risk of bias (-1)                |
| AT          | Fenfluramine             | -                                            | Moderate<br>Risk of bias (-1)                | Moderate<br>Risk of bias (-1)                |
| AT          | HM                       | -                                            | Moderate<br>Risk of bias (-1)                | Moderate<br>Risk of bias (-1)                |
| AT          | HM + AT                  | Low<br>Risk of bias (-1)<br>Imprecision (-1) | -                                            | Low<br>Risk of bias (-1)<br>Imprecision (-1) |
| AT          | HM + acupressure         | -                                            | Low<br>Risk of bias (-1)<br>Imprecision (-1) | Low<br>Risk of bias (-1)<br>Imprecision (-1) |
| AT          | None                     | Moderate<br>Risk of bias (-1)                | -                                            | Moderate<br>Risk of bias (-1)                |
| Acupressure | Chuna                    | -                                            | Low<br>Risk of bias (-1)<br>Imprecision (-1) | Low<br>Risk of bias (-1)<br>Imprecision (-1) |

|             |                          |                                              |                                              |                                              |
|-------------|--------------------------|----------------------------------------------|----------------------------------------------|----------------------------------------------|
| Acupressure | Chuna + AT               | -                                            | Low<br>Risk of bias (-1)<br>Imprecision (-1) | Low<br>Risk of bias (-1)<br>Imprecision (-1) |
| Acupressure | Chuna +<br>acupressure   | -                                            | Low<br>Risk of bias (-1)<br>Imprecision (-1) | Low<br>Risk of bias (-1)<br>Imprecision (-1) |
| Acupressure | Cupping                  | -                                            | Low<br>Risk of bias (-1)<br>Imprecision (-1) | Low<br>Risk of bias (-1)<br>Imprecision (-1) |
| Acupressure | Cupping +<br>acupressure | -                                            | Low<br>Risk of bias (-1)<br>Imprecision (-1) | Low<br>Risk of bias (-1)<br>Imprecision (-1) |
| Acupressure | Fenfluramine             | -                                            | Low<br>Risk of bias (-1)<br>Imprecision (-1) | Low<br>Risk of bias (-1)<br>Imprecision (-1) |
| Acupressure | HM                       | -                                            | Moderate<br>Risk of bias (-1)                | Moderate<br>Risk of bias (-1)                |
| Acupressure | HM + AT                  | -                                            | Moderate<br>Risk of bias (-1)                | Moderate<br>Risk of bias (-1)                |
| Acupressure | HM + acupressure         | -                                            | Low<br>Risk of bias (-1)<br>Imprecision (-1) | Low<br>Risk of bias (-1)<br>Imprecision (-1) |
| Acupressure | None                     | Moderate<br>Risk of bias (-1)                | -                                            | Moderate<br>Risk of bias (-1)                |
| Chuna       | Chuna + AT               | -                                            | Low<br>Risk of bias (-1)<br>Imprecision (-1) | Low<br>Risk of bias (-1)<br>Imprecision (-1) |
| Chuna       | Chuna +<br>acupressure   | Low<br>Risk of bias (-1)<br>Imprecision (-1) | Low<br>Risk of bias (-1)<br>Imprecision (-1) | Low<br>Risk of bias (-1)<br>Imprecision (-1) |
| Chuna       | Cupping                  | -                                            | Low<br>Risk of bias (-1)<br>Imprecision (-1) | Low<br>Risk of bias (-1)<br>Imprecision (-1) |
| Chuna       | Cupping +<br>acupressure | Low<br>Risk of bias (-1)<br>Imprecision (-1) | -                                            | Low<br>Risk of bias (-1)<br>Imprecision (-1) |
| Chuna       | Fenfluramine             | -                                            | Low<br>Risk of bias (-1)<br>Imprecision (-1) | Low<br>Risk of bias (-1)<br>Imprecision (-1) |
| Chuna       | HM                       | Low<br>Risk of bias (-1)<br>Imprecision (-1) | Low<br>Risk of bias (-1)<br>Imprecision (-1) | Low<br>Risk of bias (-1)<br>Imprecision (-1) |
| Chuna       | HM + AT                  | -                                            | Moderate<br>Risk of bias (-1)                | Moderate<br>Risk of bias (-1)                |
| Chuna       | HM + acupressure         | -                                            | Low<br>Risk of bias (-1)<br>Imprecision (-1) | Low<br>Risk of bias (-1)<br>Imprecision (-1) |
| Chuna       | None                     | Low<br>Risk of bias (-1)<br>Imprecision (-1) | Low<br>Risk of bias (-1)<br>Imprecision (-1) | Low<br>Risk of bias (-1)<br>Imprecision (-1) |

|                        |                          |                                              |                                              |                                              |
|------------------------|--------------------------|----------------------------------------------|----------------------------------------------|----------------------------------------------|
| Chuna + AT             | Chuna +<br>acupressure   | -                                            | Low<br>Risk of bias (-1)<br>Imprecision (-1) | Low<br>Risk of bias (-1)<br>Imprecision (-1) |
| Chuna + AT             | Cupping                  | -                                            | Low<br>Risk of bias (-1)<br>Imprecision (-1) | Low<br>Risk of bias (-1)<br>Imprecision (-1) |
| Chuna + AT             | Cupping +<br>acupressure | -                                            | Moderate<br>Risk of bias (-1)                | Moderate<br>Risk of bias (-1)                |
| Chuna + AT             | Fenfluramine             | -                                            | Moderate<br>Risk of bias (-1)                | Moderate<br>Risk of bias (-1)                |
| Chuna + AT             | HM                       | -                                            | Low<br>Risk of bias (-1)<br>Imprecision (-1) | Low<br>Risk of bias (-1)<br>Imprecision (-1) |
| Chuna + AT             | HM + AT                  | -                                            | Moderate<br>Risk of bias (-1)                | Moderate<br>Risk of bias (-1)                |
| Chuna + AT             | HM + acupressure         | -                                            | Low<br>Risk of bias (-1)<br>Imprecision (-1) | Low<br>Risk of bias (-1)<br>Imprecision (-1) |
| Chuna + AT             | None                     | Low<br>Risk of bias (-1)<br>Imprecision (-1) | -                                            | Low<br>Risk of bias (-1)<br>Imprecision (-1) |
| Chuna +<br>acupressure | Cupping                  | -                                            | Low<br>Risk of bias (-1)<br>Imprecision (-1) | Low<br>Risk of bias (-1)<br>Imprecision (-1) |
| Chuna +<br>acupressure | Cupping +<br>acupressure | -                                            | Low<br>Risk of bias (-1)<br>Imprecision (-1) | Low<br>Risk of bias (-1)<br>Imprecision (-1) |
| Chuna +<br>acupressure | Fenfluramine             | -                                            | Low<br>Risk of bias (-1)<br>Imprecision (-1) | Low<br>Risk of bias (-1)<br>Imprecision (-1) |
| Chuna +<br>acupressure | HM                       | -                                            | Low<br>Risk of bias (-1)<br>Imprecision (-1) | Low<br>Risk of bias (-1)<br>Imprecision (-1) |
| Chuna +<br>acupressure | HM + AT                  | -                                            | Moderate<br>Risk of bias (-1)                | Moderate<br>Risk of bias (-1)                |
| Chuna +<br>acupressure | HM + acupressure         | -                                            | Low<br>Risk of bias (-1)<br>Imprecision (-1) | Low<br>Risk of bias (-1)<br>Imprecision (-1) |
| Chuna +<br>acupressure | None                     | Low<br>Risk of bias (-1)<br>Imprecision (-1) | Low<br>Risk of bias (-1)<br>Imprecision (-1) | Low<br>Risk of bias (-1)<br>Imprecision (-1) |
| Cupping                | Cupping +<br>acupressure | -                                            | Low<br>Risk of bias (-1)<br>Imprecision (-1) | Low<br>Risk of bias (-1)<br>Imprecision (-1) |
| Cupping                | Fenfluramine             | -                                            | Low<br>Risk of bias (-1)<br>Imprecision (-1) | Low<br>Risk of bias (-1)<br>Imprecision (-1) |
| Cupping                | HM                       | -                                            | Low<br>Risk of bias (-1)<br>Imprecision (-1) | Low<br>Risk of bias (-1)<br>Imprecision (-1) |

|                          |                  |                                              |                                              |                                              |
|--------------------------|------------------|----------------------------------------------|----------------------------------------------|----------------------------------------------|
| Cupping                  | HM + AT          | -                                            | Moderate<br>Risk of bias (-1)                | Moderate<br>Risk of bias (-1)                |
| Cupping                  | HM + acupressure | -                                            | Low<br>Risk of bias (-1)<br>Imprecision (-1) | Low<br>Risk of bias (-1)<br>Imprecision (-1) |
| Cupping                  | None             | Low<br>Risk of bias (-1)<br>Imprecision (-1) | -                                            | Low<br>Risk of bias (-1)<br>Imprecision (-1) |
| Cupping +<br>acupressure | Fenfluramine     | -                                            | Low<br>Risk of bias (-1)<br>Imprecision (-1) | Low<br>Risk of bias (-1)<br>Imprecision (-1) |
| Cupping +<br>acupressure | HM               | -                                            | Low<br>Risk of bias (-1)<br>Imprecision (-1) | Low<br>Risk of bias (-1)<br>Imprecision (-1) |
| Cupping +<br>acupressure | HM + AT          | -                                            | Moderate<br>Risk of bias (-1)                | Moderate<br>Risk of bias (-1)                |
| Cupping +<br>acupressure | HM + acupressure | -                                            | Moderate<br>Risk of bias (-1)                | Moderate<br>Risk of bias (-1)                |
| Cupping +<br>acupressure | None             | -                                            | Low<br>Risk of bias (-1)<br>Imprecision (-1) | Low<br>Risk of bias (-1)<br>Imprecision (-1) |
| Fenfluramine             | HM               | Low<br>Risk of bias (-1)<br>Imprecision (-1) | -                                            | Low<br>Risk of bias (-1)<br>Imprecision (-1) |
| Fenfluramine             | HM + AT          | -                                            | Moderate<br>Risk of bias (-1)                | Moderate<br>Risk of bias (-1)                |
| Fenfluramine             | HM + acupressure | -                                            | Moderate<br>Risk of bias (-1)                | Moderate<br>Risk of bias (-1)                |
| Fenfluramine             | None             | -                                            | Low<br>Risk of bias (-1)<br>Imprecision (-1) | Low<br>Risk of bias (-1)<br>Imprecision (-1) |
| HM                       | HM + AT          | -                                            | Moderate<br>Risk of bias (-1)                | Moderate<br>Risk of bias (-1)                |
| HM                       | HM + acupressure | -                                            | Low<br>Risk of bias (-1)<br>Imprecision (-1) | Low<br>Risk of bias (-1)<br>Imprecision (-1) |
| HM                       | None             | Moderate<br>Risk of bias (-1)                | Low<br>Risk of bias (-1)<br>Imprecision (-1) | Moderate<br>Risk of bias (-1)                |
| HM + AT                  | HM + acupressure | -                                            | Low<br>Risk of bias (-1)<br>Imprecision (-1) | Low<br>Risk of bias (-1)<br>Imprecision (-1) |
| HM + AT                  | None             | -                                            | Low<br>Risk of bias (-1)<br>Imprecision (-1) | Low<br>Risk of bias (-1)<br>Imprecision (-1) |
| HM + acupressure         | None             | Low<br>Risk of bias (-1)<br>Imprecision (-1) | -                                            | Low<br>Risk of bias (-1)<br>Imprecision (-1) |
